# Supplementary material
Source: publisher figshare collection journal article supplement (https://acs.figshare.com/ndownloader/files/5133223)
Supplement: Supplementary file 1 [file 5133223]

TITLE:  Intramolecular Metal...Sulfur Interactions of
	  Platinum(II) 1,4,7-Trithiacyclononane Complexes 
	  with Bipyridyl Ligands: the Relationship Between 
	  Molecular and Electronic Structures

AUTHORS:  Tyler W. Green, Rachel Lieberman, Neal Mitchell,
	    Jeanette A. Krause Bauer and William B. Connick


data_global
 
#========================================================  
# 1. SUBMISSION DETAILS
 

_publ_contact_author_name         'Dr. William B. Connick'       
_publ_contact_author_address
;     Department of Chemistry
      University of Cincinnati
      Cincinnati, OH 45221-0172 USA
;
_publ_contact_author_phone        '513 556 0148'
_publ_contact_author_fax          '513 556 9239'
_publ_contact_author_email        bill.connick@uc.edu
 
_publ_requested_journal           'Inorganic Chemistry'
_publ_requested_category          ? 
_publ_requested_coeditor_name     ?
 
_publ_contact_letter
;
?
;
 
#=====================================================  
 
# 2. TITLE AND AUTHOR LIST

_publ_section_title
;
Intramolecular Metal...Sulfur Interactions of
Platinum(II) 1,4,7-Trithiacyclononane Complexes with
Bipyridyl Ligands: the Relationship Between Molecular
and Electronic Structures
;

 
# The loop structure below should contain the names and addresses 
# of all authors, in the required order of publication. Repeat as 
# necessary.
 
loop_
 _publ_author_name
 _publ_author_address
     'Green, Tyler W.'
;     Department of Chemistry
      University of Cincinnati
      Cincinnati, OH 45221-0172 USA
;
     'Lieberman, Rachel'
;     Department of Chemistry
      University of Cincinnati
      Cincinnati, OH 45221-0172 USA
;
     'Mitchell, Neal'
;     Department of Chemistry
      University of Cincinnati
      Cincinnati, OH 45221-0172 USA
;
     'Krause Bauer, Jeanette A.'
;     Department of Chemistry
      University of Cincinnati
      Cincinnati, OH 45221-0172 USA
;
     'Connick, William B.'
;     Department of Chemistry
      University of Cincinnati
      Cincinnati, OH 45221-0172 USA
;

#======================================================================  

data_1 
  
_audit_creation_method            SHELXL-97 
_chemical_name_systematic 
; 
bipyridine-(1,4,7-trithiacyclononane)platinum(II) 
bis(hexafluorophosphate)
; 
_chemical_name_common             ? 
_chemical_melting_point           ? 
_chemical_formula_moiety          ?
_chemical_formula_sum 		    'C16 H20 F12 N2 P2 Pt S3' 
_chemical_formula_weight          821.55 
  
loop_ 
 _atom_type_symbol 
 _atom_type_description 
 _atom_type_scat_dispersion_real 
 _atom_type_scat_dispersion_imag 
 _atom_type_scat_source 
 'C'  'C'   0.0033   0.0016 
 'International Tables Vol C Tables 4.2.6.8 and 6.1.1.4' 
 'H'  'H'   0.0000   0.0000 
 'International Tables Vol C Tables 4.2.6.8 and 6.1.1.4' 
 'N'  'N'   0.0061   0.0033 
 'International Tables Vol C Tables 4.2.6.8 and 6.1.1.4' 
 'F'  'F'   0.0171   0.0103 
 'International Tables Vol C Tables 4.2.6.8 and 6.1.1.4' 
 'P'  'P'   0.1023   0.0942 
 'International Tables Vol C Tables 4.2.6.8 and 6.1.1.4' 
 'S'  'S'   0.1246   0.1234 
 'International Tables Vol C Tables 4.2.6.8 and 6.1.1.4' 
 'Pt'  'Pt'  -1.7033   8.3905 
 'International Tables Vol C Tables 4.2.6.8 and 6.1.1.4' 
  
_symmetry_cell_setting            Triclinic 
_symmetry_space_group_name_H-M    P-1 
_symmetry_space_group_name_Hall   '-P 1'
  
loop_ 
 _symmetry_equiv_pos_as_xyz 
 'x, y, z' 
 '-x, -y, -z' 
  
_cell_length_a                    10.2529(3) 
_cell_length_b                    10.7791(3) 
_cell_length_c                    10.7867(3) 
_cell_angle_alpha                 83.886(1) 
_cell_angle_beta                  87.565(1) 
_cell_angle_gamma                 84.901(1) 
_cell_volume                      1179.99(6) 
_cell_formula_units_Z             2 
_cell_measurement_temperature     150(2) 
_cell_measurement_reflns_used     7430 
_cell_measurement_theta_min       2.55 
_cell_measurement_theta_max       28.28 
  
_exptl_crystal_description        block 
_exptl_crystal_colour             orange 
_exptl_crystal_size_max           0.28 
_exptl_crystal_size_mid           0.17 
_exptl_crystal_size_min           0.04 
_exptl_crystal_density_meas       'not measured'  
_exptl_crystal_density_diffrn     2.312 
_exptl_crystal_density_method     ?
_exptl_crystal_F_000              788 
_exptl_absorpt_coefficient_mu     6.453 
_exptl_absorpt_correction_type    multi-scan 
_exptl_absorpt_correction_T_min   0.2652 
_exptl_absorpt_correction_T_max   0.7824 
_exptl_absorpt_process_details    'SADABS (Sheldrick)' 
  
_exptl_special_details 
; 
The crystal was mounted on the tip of a glass fiber with
epoxy resin.

The first 50 frames of data were recollected for a decay
correction. The decay correction was applied simultaneously
with the absorption correction in SADABS. No formal measure 
of the extent of decay is printed out by this program. 

The final unit cell is obtained from the refinement of
the XYZ weighted centroids of reflections above 20 \s(I).

Note that the absorption correction parameters Tmin and Tmax also 
reflect beam corrections, etc. As a result, the numerical values 
for Tmin and Tmax may differ from expected values based solely on
absorption effects and crystal size. 
; 
  
_diffrn_ambient_temperature       150(2) 
_diffrn_radiation_wavelength      0.71073 
_diffrn_radiation_type            MoK\a 
_diffrn_radiation_source          'fine-focus sealed tube' 
_diffrn_radiation_monochromator   graphite 
_diffrn_measurement_device_type   'SMART6000 CCD'
_diffrn_measurement_method        '\w scans' 
_diffrn_detector_area_resol_mean  0.75 
_diffrn_standards_number          0 
_diffrn_standards_interval_count  ? 
_diffrn_standards_interval_time   ? 
_diffrn_standards_decay_%         ? 
_diffrn_reflns_number             16783 
_diffrn_reflns_av_R_equivalents   0.0236 
_diffrn_reflns_av_sigmaI/netI     0.0319 
_diffrn_reflns_limit_h_min        -13 
_diffrn_reflns_limit_h_max        13 
_diffrn_reflns_limit_k_min        -14 
_diffrn_reflns_limit_k_max        14 
_diffrn_reflns_limit_l_min        -14 
_diffrn_reflns_limit_l_max        14 
_diffrn_reflns_theta_min          2.64 
_diffrn_reflns_theta_max          28.28 
_reflns_number_total              5855 
_reflns_number_gt                 5732 
_reflns_threshold_expression      >2\s(I) 
  
_computing_data_collection        'Bruker SMART v5.625' 
_computing_cell_refinement        'Bruker SAINT v6.28A'
_computing_data_reduction         'Bruker SAINT v6.28A' 
_computing_structure_solution     'Bruker SHELXTL v6.12' 
_computing_structure_refinement   'Bruker SHELXTL v6.12' 
_computing_molecular_graphics     
'Bruker SHELXTL v6.12 and Crystal Impact DIAMOND v2.1e (1997)'
_computing_publication_material   'Bruker SHELXTL v6.12' 
  
_refine_special_details 
; 
Refinement of F^2^ against ALL reflections.  The weighted 
R-factor wR and goodness of fit S are based on F^2^, 
conventional R-factors R are based on F, with F set to zero 
for negative F^2^. The threshold expression of F^2^ > 2\s(F^2^) 
is used only for calculating R-factors(gt) etc. and is 
not relevant to the choice of reflections for refinement.  
R-factors based on F^2^ are statistically about twice as large 
as those based on F, and R-factors based on ALL data will be 
even larger. 

All hydrogens were either located directly from the difference 
map or calculated based on geometric criteria and were treated 
with a riding model in subsequent refinements. The Uiso for these 
atoms were defined as 1.2*Ueq of the adjacent atom. 
; 
  
_refine_ls_structure_factor_coef  Fsqd 
_refine_ls_matrix_type            full 
_refine_ls_weighting_scheme       calc 
_refine_ls_weighting_details 
 'calc w=1/[\s^2^(Fo^2^)+(0.0000P)^2^+1.0663P] where P=(Fo^2^+2Fc^2^)/3' 
_atom_sites_solution_primary      direct 
_atom_sites_solution_secondary    difmap 
_atom_sites_solution_hydrogens    mixed 
_refine_ls_hydrogen_treatment     constr 
_refine_ls_extinction_method      none 
_refine_ls_extinction_coef        ? 
_refine_ls_number_reflns          5855 
_refine_ls_number_parameters      325 
_refine_ls_number_restraints      0 
_refine_ls_R_factor_all           0.0181 
_refine_ls_R_factor_gt            0.0174 
_refine_ls_wR_factor_ref          0.0447 
_refine_ls_wR_factor_gt           0.0444 
_refine_ls_goodness_of_fit_ref    1.090 
_refine_ls_restrained_S_all       1.090 
_refine_ls_shift/su_max           0.007 
_refine_ls_shift/su_mean          0.000 
  
loop_ 
 _atom_site_label 
 _atom_site_type_symbol 
 _atom_site_fract_x 
 _atom_site_fract_y 
 _atom_site_fract_z 
 _atom_site_U_iso_or_equiv 
 _atom_site_adp_type 
 _atom_site_occupancy 
 _atom_site_symmetry_multiplicity 
 _atom_site_calc_flag 
 _atom_site_refinement_flags 
 _atom_site_disorder_assembly 
 _atom_site_disorder_group 
Pt Pt 0.339460(7) 0.221196(7) 0.258573(7) 0.01283(3) Uani 1 1 d . . . 
S1 S 0.18281(6) 0.25840(5) 0.40737(5) 0.01559(10) Uani 1 1 d . . . 
S2 S 0.31146(6) 0.42757(5) 0.18619(5) 0.01600(11) Uani 1 1 d . . . 
N1 N 0.39515(19) 0.04254(18) 0.33460(18) 0.0152(4) Uani 1 1 d . . . 
N2 N 0.4926(2) 0.17466(18) 0.13959(19) 0.0165(4) Uani 1 1 d . . . 
C1 C 0.3390(2) -0.0177(2) 0.4362(2) 0.0178(4) Uani 1 1 d . . . 
H1A H 0.2686 0.0248 0.4790 0.021 Uiso 1 1 calc R . . 
C2 C 0.3803(3) -0.1393(2) 0.4801(2) 0.0213(5) Uani 1 1 d . . . 
H2A H 0.3382 -0.1802 0.5512 0.026 Uiso 1 1 calc R . . 
S3 S 0.12843(6) 0.18881(5) 0.10580(5) 0.01876(11) Uani 1 1 d . . . 
C3 C 0.4841(3) -0.2006(2) 0.4187(3) 0.0237(5) Uani 1 1 d . . . 
H3A H 0.5138 -0.2845 0.4467 0.028 Uiso 1 1 calc R . . 
C4 C 0.5444(3) -0.1378(2) 0.3156(2) 0.0230(5) Uani 1 1 d . . . 
H4A H 0.6166 -0.1779 0.2731 0.028 Uiso 1 1 calc R . . 
C5 C 0.4979(2) -0.0160(2) 0.2754(2) 0.0165(4) Uani 1 1 d . . . 
C6 C 0.5553(2) 0.0591(2) 0.1677(2) 0.0172(4) Uani 1 1 d . . . 
C7 C 0.6641(3) 0.0176(2) 0.0976(3) 0.0260(5) Uani 1 1 d . . . 
H7A H 0.7079 -0.0627 0.1193 0.031 Uiso 1 1 calc R . . 
C8 C 0.7084(3) 0.0938(3) -0.0039(3) 0.0290(6) Uani 1 1 d . . . 
H8A H 0.7838 0.0674 -0.0517 0.035 Uiso 1 1 calc R . . 
C9 C 0.6411(3) 0.2091(2) -0.0345(3) 0.0262(5) Uani 1 1 d . . . 
H9A H 0.6680 0.2618 -0.1056 0.031 Uiso 1 1 calc R . . 
C10 C 0.5347(3) 0.2473(2) 0.0387(2) 0.0206(5) Uani 1 1 d . . . 
H10A H 0.4895 0.3270 0.0175 0.025 Uiso 1 1 calc R . . 
C11 C 0.1354(2) 0.4268(2) 0.3890(2) 0.0176(4) Uani 1 1 d . . . 
H11A H 0.0563 0.4440 0.3383 0.021 Uiso 1 1 calc R . . 
H11B H 0.1141 0.4564 0.4719 0.021 Uiso 1 1 calc R . . 
C12 C 0.2464(2) 0.4968(2) 0.3255(2) 0.0189(4) Uani 1 1 d . . . 
H12A H 0.3176 0.4959 0.3849 0.023 Uiso 1 1 calc R . . 
H12B H 0.2141 0.5852 0.3023 0.023 Uiso 1 1 calc R . . 
C13 C 0.1670(3) 0.4497(2) 0.0890(2) 0.0200(5) Uani 1 1 d . . . 
H13A H 0.0882 0.4663 0.1430 0.024 Uiso 1 1 calc R . . 
H13B H 0.1750 0.5247 0.0285 0.024 Uiso 1 1 calc R . . 
C14 C 0.1470(3) 0.3394(2) 0.0177(2) 0.0208(5) Uani 1 1 d . . . 
H14A H 0.2226 0.3289 -0.0416 0.025 Uiso 1 1 calc R . . 
H14B H 0.0682 0.3616 -0.0325 0.025 Uiso 1 1 calc R . . 
C15 C 0.0011(2) 0.2237(2) 0.2213(2) 0.0202(5) Uani 1 1 d . . . 
H15A H -0.0272 0.3143 0.2085 0.024 Uiso 1 1 calc R . . 
H15B H -0.0752 0.1776 0.2069 0.024 Uiso 1 1 calc R . . 
C16 C 0.0398(2) 0.1913(2) 0.3562(2) 0.0188(4) Uani 1 1 d . . . 
H16A H 0.0550 0.0990 0.3714 0.023 Uiso 1 1 calc R . . 
H16B H -0.0361 0.2171 0.4103 0.023 Uiso 1 1 calc R . . 
P1 P 0.30459(6) -0.46937(6) 0.70480(6) 0.02018(12) Uani 1 1 d . . . 
F11 F 0.16726(16) -0.49698(16) 0.77464(16) 0.0318(4) Uani 1 1 d . . . 
F12 F 0.22673(17) -0.38668(15) 0.59479(16) 0.0310(4) Uani 1 1 d . . . 
F13 F 0.3083(2) -0.3475(2) 0.7755(2) 0.0535(6) Uani 1 1 d . . . 
F14 F 0.44079(17) -0.44087(19) 0.6349(2) 0.0420(5) Uani 1 1 d . . . 
F15 F 0.3811(2) -0.5536(2) 0.81387(19) 0.0511(5) Uani 1 1 d . . . 
F16 F 0.29935(19) -0.58999(16) 0.63170(19) 0.0377(4) Uani 1 1 d . . . 
P2 P 0.99940(6) 0.17152(6) 0.73615(6) 0.01836(12) Uani 1 1 d . . . 
F21 F 0.86073(19) 0.1279(2) 0.7042(2) 0.0468(5) Uani 1 1 d . . . 
F22 F 0.92628(16) 0.26122(15) 0.83251(14) 0.0259(3) Uani 1 1 d . . . 
F23 F 0.98415(18) 0.28441(16) 0.62724(15) 0.0335(4) Uani 1 1 d . . . 
F24 F 1.13741(15) 0.21461(15) 0.76883(16) 0.0288(3) Uani 1 1 d . . . 
F25 F 1.07143(19) 0.08203(15) 0.63940(16) 0.0327(4) Uani 1 1 d . . . 
F26 F 1.01375(18) 0.05945(15) 0.84496(16) 0.0326(4) Uani 1 1 d . . . 
 
loop_ 
 _atom_site_aniso_label 
 _atom_site_aniso_U_11 
 _atom_site_aniso_U_22 
 _atom_site_aniso_U_33 
 _atom_site_aniso_U_23 
 _atom_site_aniso_U_13 
 _atom_site_aniso_U_12 
Pt 0.01182(5) 0.01215(5) 0.01382(5) -0.00111(3) 0.00156(3) 0.00168(3) 
S1 0.0148(3) 0.0172(2) 0.0142(2) -0.00285(19) 0.00234(19) 0.0015(2) 
S2 0.0164(3) 0.0127(2) 0.0184(3) -0.00150(19) 0.0008(2) 0.00066(19) 
N1 0.0147(9) 0.0142(8) 0.0165(9) -0.0012(7) 0.0004(7) 0.0001(7) 
N2 0.0160(9) 0.0163(9) 0.0169(9) -0.0032(7) 0.0027(7) 0.0002(7) 
C1 0.0163(11) 0.0181(10) 0.0185(11) -0.0011(8) 0.0009(8) -0.0002(8) 
C2 0.0219(12) 0.0199(11) 0.0211(11) 0.0039(9) -0.0030(9) -0.0025(9) 
S3 0.0227(3) 0.0167(2) 0.0172(3) -0.0037(2) -0.0002(2) -0.0007(2) 
C3 0.0273(13) 0.0159(10) 0.0266(13) 0.0010(9) -0.0037(10) 0.0031(9) 
C4 0.0235(12) 0.0180(11) 0.0260(13) -0.0022(9) 0.0002(10) 0.0058(9) 
C5 0.0154(10) 0.0169(10) 0.0172(10) -0.0027(8) -0.0008(8) 0.0006(8) 
C6 0.0173(11) 0.0176(10) 0.0163(10) -0.0027(8) 0.0006(8) 0.0014(8) 
C7 0.0228(13) 0.0232(12) 0.0298(14) -0.0039(10) 0.0089(10) 0.0066(10) 
C8 0.0252(14) 0.0277(13) 0.0324(14) -0.0055(11) 0.0151(11) 0.0020(10) 
C9 0.0282(14) 0.0237(12) 0.0252(13) -0.0002(10) 0.0122(11) -0.0026(10) 
C10 0.0232(12) 0.0175(10) 0.0198(11) -0.0003(9) 0.0043(9) 0.0005(9) 
C11 0.0170(11) 0.0155(10) 0.0203(11) -0.0072(8) 0.0003(9) 0.0039(8) 
C12 0.0178(11) 0.0162(10) 0.0233(11) -0.0071(9) 0.0006(9) -0.0001(8) 
C13 0.0214(12) 0.0174(10) 0.0205(11) -0.0004(8) -0.0043(9) 0.0023(9) 
C14 0.0267(13) 0.0194(11) 0.0164(11) -0.0022(8) -0.0045(9) -0.0014(9) 
C15 0.0158(11) 0.0218(11) 0.0234(12) -0.0046(9) 0.0001(9) -0.0010(9) 
C16 0.0142(10) 0.0202(11) 0.0221(11) -0.0037(9) 0.0025(9) -0.0018(8) 
P1 0.0161(3) 0.0225(3) 0.0213(3) -0.0002(2) -0.0007(2) -0.0009(2) 
F11 0.0225(8) 0.0339(8) 0.0354(9) 0.0059(7) 0.0087(7) 0.0020(7) 
F12 0.0305(9) 0.0285(8) 0.0310(9) 0.0078(7) -0.0045(7) 0.0027(7) 
F13 0.0499(13) 0.0566(13) 0.0625(14) -0.0369(11) -0.0055(11) -0.0122(10) 
F14 0.0193(8) 0.0496(11) 0.0538(12) 0.0085(9) 0.0075(8) -0.0055(8) 
F15 0.0308(10) 0.0784(15) 0.0373(11) 0.0214(10) -0.0107(8) 0.0043(10) 
F16 0.0366(10) 0.0242(8) 0.0528(11) -0.0129(8) 0.0014(8) 0.0048(7) 
P2 0.0182(3) 0.0197(3) 0.0173(3) -0.0032(2) 0.0021(2) -0.0022(2) 
F21 0.0293(10) 0.0699(14) 0.0473(11) -0.0210(10) -0.0052(8) -0.0185(9) 
F22 0.0255(8) 0.0306(8) 0.0209(7) -0.0066(6) 0.0052(6) 0.0038(6) 
F23 0.0431(10) 0.0320(8) 0.0203(8) 0.0037(6) 0.0051(7) 0.0135(7) 
F24 0.0182(7) 0.0276(8) 0.0415(9) -0.0058(7) 0.0010(7) -0.0044(6) 
F25 0.0461(11) 0.0242(8) 0.0276(8) -0.0083(6) 0.0113(7) -0.0014(7) 
F26 0.0442(10) 0.0237(8) 0.0282(8) 0.0041(6) 0.0076(7) -0.0046(7) 
  
_geom_special_details 
; 
All esds (except the esd in the dihedral angle 
between two l.s. planes) are estimated using the 
full covariance matrix. The cell esds are taken 
into account individually in the estimation of 
esds in distances, angles and torsion angles; 
correlations between esds in cell parameters are 
only used when they are defined by crystal symmetry.  
An approximate (isotropic) treatment of cell esds is 
used for estimating esds involving l.s. planes. 
;
  
loop_ 
 _geom_bond_atom_site_label_1 
 _geom_bond_atom_site_label_2 
 _geom_bond_distance 
 _geom_bond_site_symmetry_2 
 _geom_bond_publ_flag 
Pt N2 2.047(2) . ? 
Pt N1 2.0530(19) . ? 
Pt S1 2.2627(6) . ? 
Pt S2 2.2751(5) . ? 
S1 C16 1.822(2) . ? 
S1 C11 1.829(2) . ? 
S2 C12 1.824(2) . ? 
S2 C13 1.835(3) . ? 
N1 C1 1.348(3) . ? 
N1 C5 1.351(3) . ? 
N2 C10 1.349(3) . ? 
N2 C6 1.360(3) . ? 
C1 C2 1.381(3) . ? 
C2 C3 1.384(4) . ? 
S3 C15 1.809(3) . ? 
S3 C14 1.812(2) . ? 
C3 C4 1.390(4) . ? 
C4 C5 1.387(3) . ? 
C5 C6 1.476(3) . ? 
C6 C7 1.389(3) . ? 
C7 C8 1.383(4) . ? 
C8 C9 1.382(4) . ? 
C9 C10 1.378(3) . ? 
C11 C12 1.519(3) . ? 
C13 C14 1.516(3) . ? 
C15 C16 1.521(3) . ? 
P1 F13 1.592(2) . ? 
P1 F15 1.5962(19) . ? 
P1 F16 1.5967(18) . ? 
P1 F14 1.5969(18) . ? 
P1 F12 1.6026(17) . ? 
P1 F11 1.6047(17) . ? 
P2 F24 1.5926(16) . ? 
P2 F26 1.5936(17) . ? 
P2 F21 1.5990(19) . ? 
P2 F23 1.6008(17) . ? 
P2 F25 1.6085(16) . ? 
P2 F22 1.6113(16) . ? 
  
loop_ 
 _geom_angle_atom_site_label_1 
 _geom_angle_atom_site_label_2 
 _geom_angle_atom_site_label_3 
 _geom_angle 
 _geom_angle_site_symmetry_1 
 _geom_angle_site_symmetry_3 
 _geom_angle_publ_flag 
N2 Pt N1 79.60(8) . . ? 
N2 Pt S1 173.41(6) . . ? 
N1 Pt S1 94.80(6) . . ? 
N2 Pt S2 96.66(6) . . ? 
N1 Pt S2 170.05(6) . . ? 
S1 Pt S2 88.30(2) . . ? 
C16 S1 C11 103.26(11) . . ? 
C16 S1 Pt 104.33(8) . . ? 
C11 S1 Pt 106.80(8) . . ? 
C12 S2 C13 100.89(11) . . ? 
C12 S2 Pt 101.46(8) . . ? 
C13 S2 Pt 107.72(8) . . ? 
C1 N1 C5 119.2(2) . . ? 
C1 N1 Pt 125.63(16) . . ? 
C5 N1 Pt 115.13(15) . . ? 
C10 N2 C6 118.9(2) . . ? 
C10 N2 Pt 126.05(17) . . ? 
C6 N2 Pt 115.10(15) . . ? 
N1 C1 C2 122.2(2) . . ? 
C1 C2 C3 118.9(2) . . ? 
C15 S3 C14 103.47(12) . . ? 
C15 S3 Pt 95.29(8) . . ? 
C14 S3 Pt 91.03(8) . . ? 
C2 C3 C4 119.1(2) . . ? 
C5 C4 C3 119.3(2) . . ? 
N1 C5 C4 121.2(2) . . ? 
N1 C5 C6 115.2(2) . . ? 
C4 C5 C6 123.6(2) . . ? 
N2 C6 C7 121.1(2) . . ? 
N2 C6 C5 114.9(2) . . ? 
C7 C6 C5 124.0(2) . . ? 
C8 C7 C6 119.7(2) . . ? 
C9 C8 C7 118.8(2) . . ? 
C10 C9 C8 119.5(2) . . ? 
N2 C10 C9 122.0(2) . . ? 
C12 C11 S1 110.18(16) . . ? 
C11 C12 S2 111.96(16) . . ? 
C14 C13 S2 114.36(17) . . ? 
C13 C14 S3 118.23(17) . . ? 
C16 C15 S3 115.13(17) . . ? 
C15 C16 S1 118.05(17) . . ? 
F13 P1 F15 91.33(13) . . ? 
F13 P1 F16 178.86(13) . . ? 
F15 P1 F16 89.80(12) . . ? 
F13 P1 F14 89.77(12) . . ? 
F15 P1 F14 90.13(11) . . ? 
F16 P1 F14 90.21(11) . . ? 
F13 P1 F12 89.46(11) . . ? 
F15 P1 F12 179.10(12) . . ? 
F16 P1 F12 89.40(10) . . ? 
F14 P1 F12 90.29(10) . . ? 
F13 P1 F11 89.99(11) . . ? 
F15 P1 F11 90.22(10) . . ? 
F16 P1 F11 90.02(10) . . ? 
F14 P1 F11 179.58(11) . . ? 
F12 P1 F11 89.36(9) . . ? 
F24 P2 F26 89.99(10) . . ? 
F24 P2 F21 179.67(12) . . ? 
F26 P2 F21 89.71(11) . . ? 
F24 P2 F23 90.20(10) . . ? 
F26 P2 F23 179.65(11) . . ? 
F21 P2 F23 90.10(11) . . ? 
F24 P2 F25 90.03(9) . . ? 
F26 P2 F25 89.98(9) . . ? 
F21 P2 F25 90.12(11) . . ? 
F23 P2 F25 90.33(9) . . ? 
F24 P2 F22 90.35(9) . . ? 
F26 P2 F22 90.20(9) . . ? 
F21 P2 F22 89.51(10) . . ? 
F23 P2 F22 89.50(9) . . ? 
F25 P2 F22 179.59(10) . . ? 
  
  
_diffrn_measured_fraction_theta_max    0.998 
_diffrn_reflns_theta_full              28.28 
_diffrn_measured_fraction_theta_full   0.998 
_refine_diff_density_max    1.411 
_refine_diff_density_min   -0.557 
_refine_diff_density_rms    0.095 

# eof data_1 ================================================ 

 
data_2 
 
_audit_creation_method            SHELXL-97 
_chemical_name_systematic 
; 
4,4'-dimethylbipyridine-(1,4,7-trithiacyclononane)platinum(II) 
bis(hexafluorophosphate) hydrate acetonitrile solvate

; 
_chemical_name_common             ? 
_chemical_melting_point           ? 
_chemical_formula_moiety          ? 
_chemical_formula_sum             'C20 H29 F12 N3 O P2 Pt S3' 
_chemical_formula_weight          908.67 
 
loop_ 
 _atom_type_symbol 
 _atom_type_description 
 _atom_type_scat_dispersion_real 
 _atom_type_scat_dispersion_imag 
 _atom_type_scat_source 
 'C'  'C'   0.0033   0.0016 
 'International Tables Vol C Tables 4.2.6.8 and 6.1.1.4' 
 'H'  'H'   0.0000   0.0000 
 'International Tables Vol C Tables 4.2.6.8 and 6.1.1.4' 
 'N'  'N'   0.0061   0.0033 
 'International Tables Vol C Tables 4.2.6.8 and 6.1.1.4' 
 'F'  'F'   0.0171   0.0103 
 'International Tables Vol C Tables 4.2.6.8 and 6.1.1.4' 
 'P'  'P'   0.1023   0.0942 
 'International Tables Vol C Tables 4.2.6.8 and 6.1.1.4' 
 'S'  'S'   0.1246   0.1234 
 'International Tables Vol C Tables 4.2.6.8 and 6.1.1.4' 
 'Pt'  'Pt'  -1.7033   8.3905 
 'International Tables Vol C Tables 4.2.6.8 and 6.1.1.4' 
 'O'  'O'   0.0106   0.0060 
 'International Tables Vol C Tables 4.2.6.8 and 6.1.1.4' 
 
_symmetry_cell_setting            Triclinic 
_symmetry_space_group_name_H-M    P-1 
_symmetry_space_group_name_Hall   '-P 1'

 
loop_ 
 _symmetry_equiv_pos_as_xyz 
 'x, y, z' 
 '-x, -y, -z' 
 
_cell_length_a                    10.1895(3) 
_cell_length_b                    11.8566(4) 
_cell_length_c                    13.1004(4) 
_cell_angle_alpha                 77.345(1) 
_cell_angle_beta                  79.967(1) 
_cell_angle_gamma                 72.341(1) 
_cell_volume                      1461.56(8) 
_cell_formula_units_Z             2 
_cell_measurement_temperature     100(2) 
_cell_measurement_reflns_used     6666 
_cell_measurement_theta_min       2.21 
_cell_measurement_theta_max       26.37 
 
_exptl_crystal_description        'rectangular block' 
_exptl_crystal_colour             yellow 
_exptl_crystal_size_max           0.15 
_exptl_crystal_size_mid           0.10 
_exptl_crystal_size_min           0.04 
_exptl_crystal_density_meas       'not measured'  
_exptl_crystal_density_diffrn     2.065 
_exptl_crystal_density_method     ?
_exptl_crystal_F_000              884 
_exptl_absorpt_coefficient_mu     5.224 
_exptl_absorpt_correction_type    multi-scan 
_exptl_absorpt_correction_T_min   0.5079 
_exptl_absorpt_correction_T_max   0.8183 
_exptl_absorpt_process_details    'SADABS (Sheldrick)' 
 
_exptl_special_details 
; 
A suitable crystal was mounted on a Cryo-loop with paratone-N 
and immediately transferred to the goniostat bathed in a cold 
stream. 

The first 50 frames of data were recollected for a decay
correction. The decay correction was applied simultaneously
with the absorption correction in SADABS. No formal measure 
of the extent of decay is printed out by this program. 

The final unit cell is obtained from the refinement of
the XYZ weighted centroids of reflections above 20 \s(I).

Note that the absorption correction parameters Tmin and Tmax also 
reflect beam corrections, etc. As a result, the numerical values 
for Tmin and Tmax may differ from expected values based solely on
absorption effects and crystal size. 

; 
 
_diffrn_ambient_temperature       100(2) 
_diffrn_radiation_wavelength      0.71073 
_diffrn_radiation_type            MoK\a 
_diffrn_radiation_source          'fine-focus sealed tube' 
_diffrn_radiation_monochromator   graphite 
_diffrn_measurement_device_type   'SMART6000 CCD' 
_diffrn_measurement_method        '\w scans' 
_diffrn_detector_area_resol_mean  0.80 
_diffrn_standards_number          0 
_diffrn_standards_interval_count  ? 
_diffrn_standards_interval_time   ? 
_diffrn_standards_decay_%         ? 
_diffrn_reflns_number             17480 
_diffrn_reflns_av_R_equivalents   0.0260 
_diffrn_reflns_av_sigmaI/netI     0.0277 
_diffrn_reflns_limit_h_min        -12 
_diffrn_reflns_limit_h_max        12 
_diffrn_reflns_limit_k_min        -14 
_diffrn_reflns_limit_k_max        14 
_diffrn_reflns_limit_l_min        -16 
_diffrn_reflns_limit_l_max        16 
_diffrn_reflns_theta_min          1.60 
_diffrn_reflns_theta_max          26.37 
_reflns_number_total              5978 
_reflns_number_gt                 5649 
_reflns_threshold_expression      >2\s(I) 
 
_computing_data_collection        'Bruker SMART v5.628' 
_computing_cell_refinement        'Bruker SAINT v6.28A'
_computing_data_reduction         'Bruker SAINT v6.28A' 
_computing_structure_solution     'Bruker SHELXTL v6.12' 
_computing_structure_refinement   'Bruker SHELXTL v6.12' 
_computing_molecular_graphics     
'Bruker SHELXTL v6.12 and Crystal Impact DIAMOND v2.1e (1997)'
_computing_publication_material   'Bruker SHELXTL v6.12' 
  
_refine_special_details 
; 
Refinement of F^2^ against ALL reflections.  The weighted 
R-factor wR and goodness of fit S are based on F^2^, 
conventional R-factors R are based on F, with F set to zero 
for negative F^2^. The threshold expression of F^2^ > 2\s(F^2^) 
is used only for calculating R-factors(gt) etc. and is 
not relevant to the choice of reflections for refinement.  
R-factors based on F^2^ are statistically about twice as large 
as those based on F, and R-factors based on ALL data will be 
even larger. 

The water hydrogen atoms were located directly from the difference
map and held fixed at that location. The other hydrogen atoms were
either located directly or calculated, they were treated with a 
riding model. The Uiso for these atoms were defined as a*Ueq of the 
adjacent atom (a=1.5 for -CH~3~ and -OH, 1.2 for all others). 

One PF~6~ anion shows typical disorder, the best disorder model
is presented with occupancies in the range 65-74% for the major
component. The largest residual electron density peaks are in 
the area of the disordered PF~6~.

One molecule of water and one molecule of acetonitrile are 
incorporated in the lattice.

; 
  
_refine_ls_structure_factor_coef  Fsqd  
_refine_ls_matrix_type            full 
_refine_ls_weighting_scheme       calc  
_refine_ls_weighting_details 
 'calc w=1/[\s^2^(Fo^2^)+(0.0373P)^2^+3.0867P] where P=(Fo^2^+2Fc^2^)/3' 
_atom_sites_solution_primary      Patterson 
_atom_sites_solution_secondary    difmap 
_atom_sites_solution_hydrogens    mixed
_refine_ls_hydrogen_treatment     mixed 
_refine_ls_extinction_method      none 
_refine_ls_extinction_coef        ? 
_refine_ls_number_reflns          5978 
_refine_ls_number_parameters      406 
_refine_ls_number_restraints      0 
_refine_ls_R_factor_all           0.0269 
_refine_ls_R_factor_gt            0.0249 
_refine_ls_wR_factor_ref          0.0650 
_refine_ls_wR_factor_gt           0.0638 
_refine_ls_goodness_of_fit_ref    1.049 
_refine_ls_restrained_S_all       1.049 
_refine_ls_shift/su_max           0.002 
_refine_ls_shift/su_mean          0.000 
 
loop_ 
 _atom_site_label 
 _atom_site_type_symbol 
 _atom_site_fract_x 
 _atom_site_fract_y 
 _atom_site_fract_z 
 _atom_site_U_iso_or_equiv 
 _atom_site_adp_type 
 _atom_site_occupancy 
 _atom_site_symmetry_multiplicity 
 _atom_site_calc_flag 
 _atom_site_refinement_flags 
 _atom_site_disorder_assembly 
 _atom_site_disorder_group 
Pt Pt 0.761123(12) 0.501449(11) 0.632827(10) 0.01206(5) Uani 1 1 d . . . 
N1 N 0.8794(3) 0.3295(3) 0.6248(2) 0.0140(6) Uani 1 1 d . . . 
C1 C 0.9131(4) 0.2403(3) 0.7083(3) 0.0175(7) Uani 1 1 d . . . 
H1 H 0.8731 0.2546 0.7770 0.021 Uiso 1 1 calc R . . 
C2 C 1.0036(4) 0.1293(3) 0.6968(3) 0.0216(8) Uani 1 1 d . . . 
H2 H 1.0255 0.0691 0.7571 0.026 Uiso 1 1 calc R . . 
C3 C 1.0626(4) 0.1056(3) 0.5973(3) 0.0200(8) Uani 1 1 d . . . 
C4 C 1.0258(4) 0.1976(3) 0.5116(3) 0.0182(7) Uani 1 1 d . . . 
H4 H 1.0627 0.1842 0.4421 0.022 Uiso 1 1 calc R . . 
C5 C 0.9360(4) 0.3079(3) 0.5271(3) 0.0137(7) Uani 1 1 d . . . 
N2 N 0.8286(3) 0.5177(3) 0.4741(2) 0.0141(6) Uani 1 1 d . . . 
C6 C 0.9001(3) 0.4120(3) 0.4415(3) 0.0135(7) Uani 1 1 d . . . 
C7 C 0.9392(4) 0.4055(3) 0.3358(3) 0.0151(7) Uani 1 1 d . . . 
H7 H 0.9861 0.3300 0.3153 0.018 Uiso 1 1 calc R . . 
C8 C 0.9100(4) 0.5094(3) 0.2590(3) 0.0165(7) Uani 1 1 d . . . 
C9 C 0.8386(4) 0.6170(3) 0.2945(3) 0.0173(7) Uani 1 1 d . . . 
H9 H 0.8175 0.6899 0.2451 0.021 Uiso 1 1 calc R . . 
C10 C 0.7984(4) 0.6184(3) 0.4004(3) 0.0152(7) Uani 1 1 d . . . 
H10 H 0.7479 0.6924 0.4223 0.018 Uiso 1 1 calc R . . 
S2 S 0.66097(9) 0.69986(8) 0.63750(7) 0.01627(18) Uani 1 1 d . . . 
C13 C 0.4709(4) 0.7315(4) 0.6464(3) 0.0246(8) Uani 1 1 d . . . 
H13A H 0.4337 0.7222 0.7218 0.030 Uiso 1 1 calc R . . 
H13B H 0.4329 0.8168 0.6145 0.030 Uiso 1 1 calc R . . 
C14 C 0.4171(4) 0.6556(4) 0.5953(4) 0.0261(9) Uani 1 1 d . . . 
H14A H 0.4412 0.6760 0.5183 0.031 Uiso 1 1 calc R . . 
H14B H 0.3147 0.6805 0.6092 0.031 Uiso 1 1 calc R . . 
S3 S 0.47385(9) 0.49401(9) 0.63192(7) 0.01830(18) Uani 1 1 d . . . 
C15 C 0.4384(4) 0.4650(4) 0.7744(3) 0.0187(7) Uani 1 1 d . . . 
H15A H 0.3970 0.5428 0.7990 0.022 Uiso 1 1 calc R . . 
H15B H 0.3688 0.4187 0.7943 0.022 Uiso 1 1 calc R . . 
C16 C 0.5653(4) 0.3959(3) 0.8313(3) 0.0173(7) Uani 1 1 d . . . 
H16A H 0.6011 0.3157 0.8107 0.021 Uiso 1 1 calc R . . 
H16B H 0.5344 0.3832 0.9079 0.021 Uiso 1 1 calc R . . 
S1 S 0.70873(9) 0.46286(8) 0.80951(7) 0.01455(17) Uani 1 1 d . . . 
C11 C 0.6282(4) 0.6073(3) 0.8523(3) 0.0200(8) Uani 1 1 d . . . 
H11A H 0.5260 0.6237 0.8602 0.024 Uiso 1 1 calc R . . 
H11B H 0.6562 0.6041 0.9217 0.024 Uiso 1 1 calc R . . 
C12 C 0.6710(4) 0.7082(4) 0.7730(3) 0.0208(8) Uani 1 1 d . . . 
H12A H 0.7673 0.7046 0.7805 0.025 Uiso 1 1 calc R . . 
H12B H 0.6102 0.7864 0.7890 0.025 Uiso 1 1 calc R . . 
C17 C 1.1655(5) -0.0124(4) 0.5826(4) 0.0305(10) Uani 1 1 d . . . 
H17A H 1.1497 -0.0749 0.6422 0.046 Uiso 1 1 calc R . . 
H17B H 1.2597 -0.0055 0.5789 0.046 Uiso 1 1 calc R . . 
H17C H 1.1544 -0.0338 0.5171 0.046 Uiso 1 1 calc R . . 
C18 C 0.9530(4) 0.5050(4) 0.1441(3) 0.0208(8) Uani 1 1 d . . . 
H18A H 1.0259 0.5458 0.1180 0.031 Uiso 1 1 calc R . . 
H18B H 0.8728 0.5453 0.1049 0.031 Uiso 1 1 calc R . . 
H18C H 0.9882 0.4210 0.1343 0.031 Uiso 1 1 calc R . . 
O19W O 1.1014(3) 0.1379(3) 1.2637(3) 0.0383(8) Uani 1 1 d . . . 
H19A H 1.1855 0.0814 1.2554 0.057 Uiso 1 1 d . . . 
H19B H 1.0502 0.1321 1.2028 0.057 Uiso 1 1 d . . . 
N20S N 0.3161(5) 0.2598(4) 0.9753(3) 0.0383(9) Uani 1 1 d . . . 
C21S C 0.2981(5) 0.1690(4) 0.9779(3) 0.0272(9) Uani 1 1 d . . . 
C22S C 0.2730(6) 0.0541(4) 0.9811(4) 0.0360(11) Uani 1 1 d . . . 
H22A H 0.3188 0.0230 0.9167 0.054 Uiso 1 1 calc R . . 
H22B H 0.1730 0.0647 0.9863 0.054 Uiso 1 1 calc R . . 
H22C H 0.3103 -0.0029 1.0425 0.054 Uiso 1 1 calc R . . 
P1 P 0.81596(10) 0.22970(9) 1.07581(7) 0.01793(19) Uani 1 1 d . . . 
F11 F 0.8230(3) 0.2610(2) 1.18848(19) 0.0309(6) Uani 1 1 d . . . 
F12 F 0.8057(3) 0.2002(2) 0.96469(19) 0.0329(6) Uani 1 1 d . . . 
F13 F 0.7183(3) 0.3644(2) 1.04501(19) 0.0320(6) Uani 1 1 d . . . 
F14 F 0.9116(3) 0.0961(2) 1.1087(2) 0.0343(6) Uani 1 1 d . . . 
F15 F 0.6812(3) 0.1862(2) 1.1256(2) 0.0362(6) Uani 1 1 d . . . 
F16 F 0.9494(3) 0.2745(3) 1.0271(2) 0.0424(7) Uani 1 1 d . . . 
P2 P 1.46037(15) -0.08853(10) 1.31386(9) 0.0344(3) Uani 1 1 d . . . 
F21 F 1.5276(4) -0.1465(3) 1.4210(2) 0.0567(9) Uani 1 1 d . A . 
F22 F 1.5342(4) -0.2056(3) 1.2697(3) 0.0658(11) Uani 1 1 d . A . 
F23 F 1.3351(4) -0.1460(5) 1.3677(4) 0.0962(17) Uani 1 1 d . A . 
F24A F 1.5640(7) -0.0162(6) 1.2646(5) 0.0655(16) Uani 0.65 1 d P A 1 
F25A F 1.3693(7) 0.0262(4) 1.3664(4) 0.0607(16) Uani 0.70 1 d P . 1 
F26A F 1.3779(7) -0.0351(6) 1.2127(4) 0.079(2) Uani 0.74 1 d P . 1 
F24B F 1.6382(11) -0.0907(11) 1.2796(8) 0.054(2) Uani 0.35 1 d P A 2 
F25B F 1.4535(14) 0.0161(19) 1.3587(16) 0.108(9) Uani 0.30 1 d P A 2 
F26B F 1.4602(12) -0.0136(13) 1.1974(10) 0.049(4) Uani 0.26 1 d P A 2 
 
loop_ 
 _atom_site_aniso_label 
 _atom_site_aniso_U_11 
 _atom_site_aniso_U_22 
 _atom_site_aniso_U_33 
 _atom_site_aniso_U_23 
 _atom_site_aniso_U_13 
 _atom_site_aniso_U_12 
Pt 0.01315(8) 0.01023(8) 0.01202(8) -0.00008(5) -0.00192(5) -0.00315(5) 
N1 0.0149(14) 0.0110(14) 0.0153(15) -0.0001(11) -0.0013(11) -0.0041(11) 
C1 0.0193(17) 0.0156(18) 0.0142(17) 0.0021(14) 0.0003(14) -0.0044(14) 
C2 0.0237(19) 0.0166(18) 0.0209(19) 0.0031(15) -0.0033(15) -0.0043(15) 
C3 0.0191(18) 0.0139(18) 0.024(2) -0.0017(15) -0.0002(15) -0.0028(14) 
C4 0.0193(17) 0.0180(18) 0.0160(17) -0.0016(14) -0.0007(14) -0.0050(14) 
C5 0.0150(16) 0.0146(17) 0.0122(16) -0.0002(13) -0.0007(13) -0.0068(13) 
N2 0.0127(13) 0.0151(15) 0.0156(14) -0.0020(12) -0.0023(11) -0.0053(11) 
C6 0.0126(15) 0.0116(16) 0.0156(17) 0.0011(13) -0.0035(13) -0.0038(13) 
C7 0.0140(16) 0.0169(18) 0.0139(17) -0.0010(14) -0.0006(13) -0.0052(13) 
C8 0.0142(16) 0.0217(19) 0.0147(17) 0.0011(14) -0.0025(13) -0.0089(14) 
C9 0.0175(17) 0.0172(18) 0.0170(18) 0.0035(14) -0.0045(14) -0.0075(14) 
C10 0.0165(16) 0.0124(17) 0.0171(17) 0.0016(13) -0.0051(13) -0.0058(13) 
S2 0.0180(4) 0.0119(4) 0.0185(4) -0.0022(3) -0.0028(3) -0.0036(3) 
C13 0.0207(19) 0.021(2) 0.029(2) -0.0052(17) -0.0049(16) -0.0002(15) 
C14 0.0222(19) 0.022(2) 0.032(2) 0.0041(17) -0.0093(17) -0.0064(16) 
S3 0.0206(4) 0.0216(5) 0.0142(4) 0.0011(3) -0.0042(3) -0.0099(4) 
C15 0.0177(17) 0.025(2) 0.0148(17) -0.0033(15) 0.0002(14) -0.0090(15) 
C16 0.0214(18) 0.0189(18) 0.0137(17) 0.0003(14) -0.0005(14) -0.0118(15) 
S1 0.0157(4) 0.0153(4) 0.0128(4) -0.0015(3) -0.0020(3) -0.0049(3) 
C11 0.0272(19) 0.0180(19) 0.0166(18) -0.0075(15) 0.0012(15) -0.0077(15) 
C12 0.0253(19) 0.0190(19) 0.0204(19) -0.0065(15) 0.0001(15) -0.0090(15) 
C17 0.034(2) 0.015(2) 0.031(2) -0.0002(17) 0.0010(18) 0.0038(17) 
C18 0.0230(19) 0.025(2) 0.0139(17) 0.0004(15) -0.0016(14) -0.0093(16) 
O19W 0.0363(18) 0.0365(19) 0.043(2) -0.0133(16) -0.0051(15) -0.0073(14) 
N20S 0.054(3) 0.036(2) 0.032(2) -0.0067(18) -0.0081(19) -0.020(2) 
C21S 0.038(2) 0.028(2) 0.0185(19) -0.0043(17) -0.0019(17) -0.0138(18) 
C22S 0.054(3) 0.028(2) 0.031(2) -0.0069(19) -0.002(2) -0.020(2) 
P1 0.0216(5) 0.0154(5) 0.0138(4) 0.0015(4) -0.0009(4) -0.0042(4) 
F11 0.0428(15) 0.0303(14) 0.0214(12) -0.0025(10) -0.0113(11) -0.0099(11) 
F12 0.0539(16) 0.0221(13) 0.0171(12) -0.0043(10) -0.0051(11) -0.0010(11) 
F13 0.0484(15) 0.0178(12) 0.0217(12) -0.0047(10) -0.0068(11) 0.0050(11) 
F14 0.0410(15) 0.0186(12) 0.0313(14) 0.0063(10) -0.0081(11) 0.0037(11) 
F15 0.0312(14) 0.0377(15) 0.0455(16) -0.0175(13) 0.0124(12) -0.0200(12) 
F16 0.0358(15) 0.0365(16) 0.0535(18) -0.0085(13) 0.0181(13) -0.0204(12) 
P2 0.0614(8) 0.0179(5) 0.0209(5) -0.0011(4) -0.0063(5) -0.0072(5) 
F21 0.067(2) 0.059(2) 0.0335(16) -0.0015(15) -0.0147(15) -0.0004(17) 
F22 0.065(2) 0.049(2) 0.069(2) -0.0252(18) -0.0193(19) 0.0220(17) 
F23 0.046(2) 0.156(5) 0.114(4) -0.067(4) 0.002(2) -0.044(3) 
F24A 0.079(4) 0.064(4) 0.052(3) 0.007(3) 0.014(3) -0.041(4) 
F25A 0.097(5) 0.022(2) 0.038(3) -0.0082(19) 0.000(3) 0.017(3) 
F26A 0.090(4) 0.087(4) 0.027(3) -0.012(3) -0.033(3) 0.039(4) 
F24B 0.052(6) 0.055(7) 0.056(6) 0.002(5) 0.000(5) -0.027(5) 
F25B 0.036(7) 0.160(18) 0.157(17) -0.142(16) -0.010(9) 0.011(9) 
F26B 0.019(5) 0.059(8) 0.033(7) 0.025(5) 0.002(5) 0.016(6) 
 
_geom_special_details 
; 
 All esds (except the esd in the dihedral angle 
between two l.s. planes) are estimated using the 
full covariance matrix. The cell esds are taken 
into account individually in the estimation of 
esds in distances, angles and torsion angles; 
correlations between esds in cell parameters are 
only used when they are defined by crystal symmetry.  
An approximate (isotropic) treatment of cell esds is 
used for estimating esds involving l.s. planes. 
 
; 
 
loop_ 
 _geom_bond_atom_site_label_1 
 _geom_bond_atom_site_label_2 
 _geom_bond_distance 
 _geom_bond_site_symmetry_2 
 _geom_bond_publ_flag 
Pt N1 2.044(3) . ? 
Pt N2 2.060(3) . ? 
Pt S1 2.2595(9) . ? 
Pt S2 2.2725(9) . ? 
N1 C5 1.354(5) . ? 
N1 C1 1.356(5) . ? 
C1 C2 1.381(5) . ? 
C2 C3 1.386(6) . ? 
C3 C4 1.398(5) . ? 
C3 C17 1.501(5) . ? 
C4 C5 1.384(5) . ? 
C5 C6 1.475(5) . ? 
N2 C10 1.351(5) . ? 
N2 C6 1.363(5) . ? 
C6 C7 1.385(5) . ? 
C7 C8 1.400(5) . ? 
C8 C9 1.397(5) . ? 
C8 C18 1.500(5) . ? 
C9 C10 1.379(5) . ? 
S2 C12 1.822(4) . ? 
S2 C13 1.845(4) . ? 
C13 C14 1.500(6) . ? 
C14 S3 1.804(4) . ? 
S3 C15 1.814(4) . ? 
C15 C16 1.524(5) . ? 
C16 S1 1.818(4) . ? 
S1 C11 1.824(4) . ? 
C11 C12 1.521(5) . ? 
N20S C21S 1.138(6) . ? 
C21S C22S 1.451(6) . ? 
P1 F16 1.589(3) . ? 
P1 F15 1.596(3) . ? 
P1 F12 1.597(3) . ? 
P1 F14 1.599(2) . ? 
P1 F13 1.611(2) . ? 
P1 F11 1.617(3) . ? 
P2 F25B 1.464(15) . ? 
P2 F24A 1.528(6) . ? 
P2 F22 1.548(3) . ? 
P2 F26B 1.588(11) . ? 
P2 F21 1.594(3) . ? 
P2 F26A 1.600(5) . ? 
P2 F23 1.610(5) . ? 
P2 F25A 1.615(5) . ? 
P2 F24B 1.783(10) . ? 
 
loop_ 
 _geom_angle_atom_site_label_1 
 _geom_angle_atom_site_label_2 
 _geom_angle_atom_site_label_3 
 _geom_angle 
 _geom_angle_site_symmetry_1 
 _geom_angle_site_symmetry_3 
 _geom_angle_publ_flag 
N1 Pt N2 79.40(12) . . ? 
N1 Pt S1 93.96(9) . . ? 
N2 Pt S1 173.00(9) . . ? 
N1 Pt S2 171.23(8) . . ? 
N2 Pt S2 97.81(9) . . ? 
S1 Pt S2 88.43(3) . . ? 
C5 N1 C1 118.5(3) . . ? 
C5 N1 Pt 115.7(2) . . ? 
C1 N1 Pt 125.7(2) . . ? 
N1 C1 C2 122.2(3) . . ? 
C1 C2 C3 120.2(4) . . ? 
C2 C3 C4 117.3(3) . . ? 
C2 C3 C17 121.4(4) . . ? 
C4 C3 C17 121.3(4) . . ? 
C5 C4 C3 120.5(3) . . ? 
N1 C5 C4 121.4(3) . . ? 
N1 C5 C6 114.8(3) . . ? 
C4 C5 C6 123.7(3) . . ? 
C10 N2 C6 118.4(3) . . ? 
C10 N2 Pt 126.8(3) . . ? 
C6 N2 Pt 114.5(2) . . ? 
N2 C6 C7 121.7(3) . . ? 
N2 C6 C5 114.9(3) . . ? 
C7 C6 C5 123.4(3) . . ? 
C6 C7 C8 120.4(3) . . ? 
C9 C8 C7 116.8(3) . . ? 
C9 C8 C18 121.8(3) . . ? 
C7 C8 C18 121.4(3) . . ? 
C10 C9 C8 120.7(3) . . ? 
N2 C10 C9 122.1(3) . . ? 
C12 S2 C13 97.68(19) . . ? 
C12 S2 Pt 102.28(13) . . ? 
C13 S2 Pt 109.39(13) . . ? 
C14 C13 S2 116.8(3) . . ? 
C13 C14 S3 119.2(3) . . ? 
C14 S3 C15 104.7(2) . . ? 
C16 C15 S3 114.4(3) . . ? 
C15 C16 S1 117.5(3) . . ? 
C16 S1 C11 102.80(18) . . ? 
C16 S1 Pt 105.38(12) . . ? 
C11 S1 Pt 107.17(13) . . ? 
C12 C11 S1 110.8(3) . . ? 
C11 C12 S2 112.7(3) . . ? 
N20S C21S C22S 179.1(5) . . ? 
F16 P1 F15 179.21(16) . . ? 
F16 P1 F12 90.28(16) . . ? 
F15 P1 F12 90.32(15) . . ? 
F16 P1 F14 90.49(16) . . ? 
F15 P1 F14 90.02(15) . . ? 
F12 P1 F14 90.28(14) . . ? 
F16 P1 F13 90.10(16) . . ? 
F15 P1 F13 89.37(15) . . ? 
F12 P1 F13 90.67(13) . . ? 
F14 P1 F13 178.87(15) . . ? 
F16 P1 F11 90.48(16) . . ? 
F15 P1 F11 88.92(14) . . ? 
F12 P1 F11 178.85(15) . . ? 
F14 P1 F11 90.58(14) . . ? 
F13 P1 F11 88.46(14) . . ? 
F25B P2 F22 155.1(6) . . ? 
F24A P2 F22 99.1(3) . . ? 
F25B P2 F26B 92.4(11) . . ? 
F22 P2 F26B 89.9(6) . . ? 
F25B P2 F21 76.6(9) . . ? 
F24A P2 F21 96.4(3) . . ? 
F22 P2 F21 90.3(2) . . ? 
F26B P2 F21 152.6(6) . . ? 
F24A P2 F26A 89.8(4) . . ? 
F22 P2 F26A 90.3(3) . . ? 
F21 P2 F26A 173.6(4) . . ? 
F25B P2 F23 111.0(8) . . ? 
F24A P2 F23 171.6(4) . . ? 
F22 P2 F23 88.8(3) . . ? 
F26B P2 F23 121.0(6) . . ? 
F21 P2 F23 86.3(2) . . ? 
F26A P2 F23 87.3(4) . . ? 
F24A P2 F25A 87.5(4) . . ? 
F22 P2 F25A 173.3(3) . . ? 
F21 P2 F25A 89.1(2) . . ? 
F26A P2 F25A 89.6(3) . . ? 
F23 P2 F25A 84.5(3) . . ? 
F25B P2 F24B 82.8(7) . . ? 
F22 P2 F24B 73.4(4) . . ? 
F26B P2 F24B 78.0(6) . . ? 
F21 P2 F24B 75.9(4) . . ? 
F23 P2 F24B 154.5(4) . . ? 
 
 
_diffrn_measured_fraction_theta_max    0.998 
_diffrn_reflns_theta_full              26.37 
_diffrn_measured_fraction_theta_full   0.998 
_refine_diff_density_max    2.044 
_refine_diff_density_min   -1.701 
_refine_diff_density_rms    0.126 

# eof data_2 ================================================ 
  
data_3 
  
_audit_creation_method            SHELXL-97 
_chemical_name_systematic 
; 
5,5'-dimethylbipyridine-(1,4,7-trithiacyclononane)platinum(II) 
bis(hexafluorophosphate) 
; 
_chemical_name_common             ? 
_chemical_melting_point           ? 
_chemical_formula_moiety          ? 
_chemical_formula_sum 	          'C18 H24 F12 N2 P2 Pt S3' 
_chemical_formula_weight          849.60 
  
loop_ 
 _atom_type_symbol 
 _atom_type_description 
 _atom_type_scat_dispersion_real 
 _atom_type_scat_dispersion_imag 
 _atom_type_scat_source 
 'C'  'C'   0.0033   0.0016 
 'International Tables Vol C Tables 4.2.6.8 and 6.1.1.4' 
 'H'  'H'   0.0000   0.0000 
 'International Tables Vol C Tables 4.2.6.8 and 6.1.1.4' 
 'N'  'N'   0.0061   0.0033 
 'International Tables Vol C Tables 4.2.6.8 and 6.1.1.4' 
 'F'  'F'   0.0171   0.0103 
 'International Tables Vol C Tables 4.2.6.8 and 6.1.1.4' 
 'P'  'P'   0.1023   0.0942 
 'International Tables Vol C Tables 4.2.6.8 and 6.1.1.4' 
 'S'  'S'   0.1246   0.1234 
 'International Tables Vol C Tables 4.2.6.8 and 6.1.1.4' 
 'Pt'  'Pt'  -1.7033   8.3905 
 'International Tables Vol C Tables 4.2.6.8 and 6.1.1.4' 
  
_symmetry_cell_setting            Triclinic 
_symmetry_space_group_name_H-M    P-1 
_symmetry_space_group_name_Hall   '-P 1'

  
loop_ 
 _symmetry_equiv_pos_as_xyz 
 'x, y, z' 
 '-x, -y, -z' 
  
_cell_length_a                    10.6397(4) 
_cell_length_b                    10.8449(4) 
_cell_length_c                    11.2621(4) 
_cell_angle_alpha                 90.035(1) 
_cell_angle_beta                  98.061(1) 
_cell_angle_gamma                 91.283(1) 
_cell_volume                      1286.32(8) 
_cell_formula_units_Z             2 
_cell_measurement_temperature     150(2) 
_cell_measurement_reflns_used     6701 
_cell_measurement_theta_min       1.83 
_cell_measurement_theta_max       28.32 
  
_exptl_crystal_description        block 
_exptl_crystal_colour             orange
_exptl_crystal_size_max           0.20 
_exptl_crystal_size_mid           0.15 
_exptl_crystal_size_min           0.10 
_exptl_crystal_density_meas       'not measured'  
_exptl_crystal_density_diffrn     2.194 
_exptl_crystal_density_method     ?
_exptl_crystal_F_000              820 
_exptl_absorpt_coefficient_mu     5.923 
_exptl_absorpt_correction_type    multi-scan 
_exptl_absorpt_correction_T_min   0.3838 
_exptl_absorpt_correction_T_max   0.5889 
_exptl_absorpt_process_details    'SADABS (Sheldrick)' 
  
_exptl_special_details 
; 
A suitable crystal was mounted on a Cryo-loop with paratone-N 
and immediately transferred to the goniostat bathed in a cold 
stream. 

The first 50 frames of data were recollected for a decay
correction. The decay correction was applied simultaneously
with the absorption correction in SADABS. No formal measure 
of the extent of decay is printed out by this program. 

The final unit cell is obtained from the refinement of
the XYZ weighted centroids of reflections above 20 \s(I).

Note that the absorption correction parameters Tmin and Tmax also 
reflect beam corrections, etc. As a result, the numerical values 
for Tmin and Tmax may differ from expected values based solely 
absorption effects and crystal size. 
; 
  
_diffrn_ambient_temperature       150(2) 
_diffrn_radiation_wavelength      0.71073 
_diffrn_radiation_type            MoK\a 
_diffrn_radiation_source          'fine-focus sealed tube' 
_diffrn_radiation_monochromator   graphite 
_diffrn_measurement_device_type   'SMART6000 CCD' 
_diffrn_measurement_method        '\w scans' 
_diffrn_detector_area_resol_mean  0.75 
_diffrn_standards_number          0 
_diffrn_standards_interval_count  ? 
_diffrn_standards_interval_time   ? 
_diffrn_standards_decay_%         ? 
_diffrn_reflns_number             17942 
_diffrn_reflns_av_R_equivalents   0.0301 
_diffrn_reflns_av_sigmaI/netI     0.0319 
_diffrn_reflns_limit_h_min        -14 
_diffrn_reflns_limit_h_max        14 
_diffrn_reflns_limit_k_min        -14 
_diffrn_reflns_limit_k_max        14 
_diffrn_reflns_limit_l_min        -15 
_diffrn_reflns_limit_l_max        15 
_diffrn_reflns_theta_min          1.83 
_diffrn_reflns_theta_max          28.32 
_reflns_number_total              6392 
_reflns_number_gt                 6104 
_reflns_threshold_expression      >2\s(I) 
  
_computing_data_collection        'Bruker SMART v5.628' 
_computing_cell_refinement        'Bruker SAINT v6.36A'
_computing_data_reduction         'Bruker SAINT v6.36A' 
_computing_structure_solution     'Bruker SHELXTL v6.12' 
_computing_structure_refinement   'Bruker SHELXTL v6.12' 
_computing_molecular_graphics     
'Bruker SHELXTL v6.12 and Crystal Impact DIAMOND v2.1e (1997)'
_computing_publication_material   'Bruker SHELXTL v6.12' 
  
_refine_special_details 
; 
Refinement of F^2^ against ALL reflections.  The weighted 
R-factor wR and goodness of fit S are based on F^2^, 
conventional R-factors R are based on F, with F set to zero 
for negative F^2^. The threshold expression of F^2^ > 2\s(F^2^) 
is used only for calculating R-factors(gt) etc. and is 
not relevant to the choice of reflections for refinement.  
R-factors based on F^2^ are statistically about twice as large 
as those based on F, and R-factors based on ALL data will be 
even larger. 

The H-atoms were either located directly or calculated, a riding
model was applied in subsequent refinements. The Uiso for these 
atoms were defined as a*Ueq of the adjacent atom (a=1.5 for methyl 
and 1.2 for all others). 

One PF~6~ anion shows typical disorder, a reasonable disorder 
model for F1 and F2 is presented with occupancies set at 0.75
and 0.25 for the major and minor components.

; 

_refine_ls_structure_factor_coef  Fsqd 
_refine_ls_matrix_type            full 
_refine_ls_weighting_scheme       calc 
_refine_ls_weighting_details 
 'calc w=1/[\s^2^(Fo^2^)+(0.0210P)^2^+0.8577P] where P=(Fo^2^+2Fc^2^)/3' 
_atom_sites_solution_primary      Patterson 
_atom_sites_solution_secondary    difmap 
_atom_sites_solution_hydrogens    mixed 
_refine_ls_hydrogen_treatment     constr 
_refine_ls_extinction_method      none 
_refine_ls_extinction_coef        ? 
_refine_ls_number_reflns          6392 
_refine_ls_number_parameters      361 
_refine_ls_number_restraints      0 
_refine_ls_R_factor_all           0.0202 
_refine_ls_R_factor_gt            0.0190 
_refine_ls_wR_factor_ref          0.0479 
_refine_ls_wR_factor_gt           0.0472 
_refine_ls_goodness_of_fit_ref    1.018 
_refine_ls_restrained_S_all       1.018 
_refine_ls_shift/su_max           0.006 
_refine_ls_shift/su_mean          0.000 
  
loop_ 
 _atom_site_label 
 _atom_site_type_symbol 
 _atom_site_fract_x 
 _atom_site_fract_y 
 _atom_site_fract_z 
 _atom_site_U_iso_or_equiv 
 _atom_site_adp_type 
 _atom_site_occupancy 
 _atom_site_symmetry_multiplicity 
 _atom_site_calc_flag 
 _atom_site_refinement_flags 
 _atom_site_disorder_assembly 
 _atom_site_disorder_group 
Pt Pt 0.331726(8) 0.262683(8) 0.286342(7) 0.01494(3) Uani 1 1 d . . . 
S1 S 0.29107(6) 0.20746(6) 0.09009(5) 0.01906(11) Uani 1 1 d . . . 
S2 S 0.18192(6) 0.40863(6) 0.24942(5) 0.01879(11) Uani 1 1 d . . . 
S3 S 0.12403(6) 0.10157(6) 0.31989(5) 0.02105(12) Uani 1 1 d . . . 
N1 N 0.48096(19) 0.14715(19) 0.32984(17) 0.0175(4) Uani 1 1 d . . . 
N2 N 0.39867(19) 0.32443(19) 0.45613(17) 0.0172(4) Uani 1 1 d . . . 
C1 C 0.5137(2) 0.0555(2) 0.2608(2) 0.0205(5) Uani 1 1 d . . . 
H1 H 0.4640 0.0413 0.1849 0.025 Uiso 1 1 calc R . . 
C2 C 0.6164(2) -0.0193(2) 0.2947(2) 0.0214(5) Uani 1 1 d . . . 
C3 C 0.6895(3) 0.0045(3) 0.4046(2) 0.0257(5) Uani 1 1 d . . . 
H3 H 0.7624 -0.0429 0.4298 0.031 Uiso 1 1 calc R . . 
C4 C 0.6558(3) 0.0980(3) 0.4777(2) 0.0253(5) Uani 1 1 d . . . 
H4 H 0.7048 0.1139 0.5535 0.030 Uiso 1 1 calc R . . 
C5 C 0.5505(2) 0.1681(2) 0.4395(2) 0.0186(4) Uani 1 1 d . . . 
C6 C 0.5043(2) 0.2673(2) 0.5100(2) 0.0190(4) Uani 1 1 d . . . 
C7 C 0.5607(2) 0.3024(2) 0.6238(2) 0.0233(5) Uani 1 1 d . . . 
H7 H 0.6352 0.2633 0.6606 0.028 Uiso 1 1 calc R . . 
C8 C 0.5068(3) 0.3958(3) 0.6835(2) 0.0250(5) Uani 1 1 d . . . 
H8 H 0.5442 0.4200 0.7619 0.030 Uiso 1 1 calc R . . 
C9 C 0.3988(2) 0.4537(2) 0.6293(2) 0.0219(5) Uani 1 1 d . . . 
C10 C 0.3489(2) 0.4157(2) 0.5144(2) 0.0190(4) Uani 1 1 d . . . 
H10 H 0.2763 0.4559 0.4750 0.023 Uiso 1 1 calc R . . 
C11 C 0.2272(3) 0.3489(2) 0.0206(2) 0.0238(5) Uani 1 1 d . . . 
H11A H 0.2973 0.4102 0.0186 0.029 Uiso 1 1 calc R . . 
H11B H 0.1892 0.3311 -0.0632 0.029 Uiso 1 1 calc R . . 
C12 C 0.1276(2) 0.4032(2) 0.0875(2) 0.0228(5) Uani 1 1 d . . . 
H12A H 0.0484 0.3527 0.0717 0.027 Uiso 1 1 calc R . . 
H12B H 0.1087 0.4877 0.0579 0.027 Uiso 1 1 calc R . . 
C13 C 0.0448(2) 0.3473(2) 0.3125(2) 0.0223(5) Uani 1 1 d . . . 
H13A H 0.0637 0.3542 0.4009 0.027 Uiso 1 1 calc R . . 
H13B H -0.0277 0.4011 0.2864 0.027 Uiso 1 1 calc R . . 
C14 C 0.0024(2) 0.2151(2) 0.2819(2) 0.0227(5) Uani 1 1 d . . . 
H14A H -0.0278 0.2097 0.1948 0.027 Uiso 1 1 calc R . . 
H14B H -0.0705 0.1941 0.3244 0.027 Uiso 1 1 calc R . . 
C15 C 0.1325(3) 0.0263(2) 0.1771(2) 0.0240(5) Uani 1 1 d . . . 
H15A H 0.2040 -0.0312 0.1889 0.029 Uiso 1 1 calc R . . 
H15B H 0.0538 -0.0242 0.1562 0.029 Uiso 1 1 calc R . . 
C16 C 0.1489(2) 0.1069(2) 0.0701(2) 0.0218(5) Uani 1 1 d . . . 
H16A H 0.0733 0.1588 0.0522 0.026 Uiso 1 1 calc R . . 
H16B H 0.1521 0.0530 -0.0003 0.026 Uiso 1 1 calc R . . 
C17 C 0.6487(3) -0.1178(3) 0.2105(2) 0.0284(6) Uani 1 1 d . . . 
H17A H 0.7115 -0.0848 0.1623 0.043 Uiso 1 1 calc R . . 
H17B H 0.5717 -0.1441 0.1575 0.043 Uiso 1 1 calc R . . 
H17C H 0.6839 -0.1885 0.2569 0.043 Uiso 1 1 calc R . . 
C18 C 0.3346(3) 0.5527(3) 0.6914(2) 0.0291(6) Uani 1 1 d . . . 
H18A H 0.2808 0.6008 0.6315 0.044 Uiso 1 1 calc R . . 
H18B H 0.3992 0.6073 0.7362 0.044 Uiso 1 1 calc R . . 
H18C H 0.2822 0.5145 0.7468 0.044 Uiso 1 1 calc R . . 
P1 P 0.28667(7) -0.25066(7) 0.98922(6) 0.02914(15) Uani 1 1 d . . . 
F11A F 0.3536(4) -0.1456(4) 1.0724(5) 0.0682(13) Uani 0.75 1 d P A 1 
F12A F 0.2790(4) -0.3333(4) 1.1109(3) 0.0526(9) Uani 0.75 1 d P A 1 
F11B F 0.3645(11) -0.1058(10) 1.0088(11) 0.050(3) Uani 0.25 1 d P A 2 
F12B F 0.3092(11) -0.2646(13) 1.1184(8) 0.052(3) Uani 0.25 1 d P A 2 
F13 F 0.15210(19) -0.1922(2) 1.0010(2) 0.0552(6) Uani 1 1 d . A . 
F14 F 0.21179(19) -0.36556(18) 0.92087(19) 0.0435(5) Uani 1 1 d . A . 
F15 F 0.2864(3) -0.1884(3) 0.8625(3) 0.0818(10) Uani 1 1 d . A . 
F16 F 0.4204(2) -0.3089(2) 0.9768(2) 0.0585(6) Uani 1 1 d . A . 
P2 P 1.00394(7) -0.28072(6) 0.33382(6) 0.02412(13) Uani 1 1 d . . . 
F21 F 1.0131(3) -0.18443(19) 0.44140(18) 0.0556(6) Uani 1 1 d . . . 
F22 F 1.07171(19) -0.38176(17) 0.42324(16) 0.0391(4) Uani 1 1 d . . . 
F23 F 0.8689(2) -0.3283(2) 0.3641(3) 0.0687(8) Uani 1 1 d . . . 
F24 F 1.13812(16) -0.23213(19) 0.30464(16) 0.0384(4) Uani 1 1 d . . . 
F25 F 0.93576(16) -0.18143(17) 0.24225(17) 0.0369(4) Uani 1 1 d . . . 
F26 F 0.9946(2) -0.37726(18) 0.22492(17) 0.0497(5) Uani 1 1 d . . . 
 
loop_ 
 _atom_site_aniso_label 
 _atom_site_aniso_U_11 
 _atom_site_aniso_U_22 
 _atom_site_aniso_U_33 
 _atom_site_aniso_U_23 
 _atom_site_aniso_U_13 
 _atom_site_aniso_U_12 
Pt 0.01328(5) 0.01778(5) 0.01290(5) -0.00025(3) -0.00142(3) 0.00165(3) 
S1 0.0185(3) 0.0242(3) 0.0137(2) 0.0001(2) -0.0006(2) 0.0010(2) 
S2 0.0175(3) 0.0177(3) 0.0201(3) 0.0014(2) -0.0012(2) 0.0023(2) 
S3 0.0252(3) 0.0196(3) 0.0177(3) 0.0020(2) 0.0009(2) -0.0003(2) 
N1 0.0142(9) 0.0220(10) 0.0157(9) 0.0024(7) 0.0001(7) 0.0016(8) 
N2 0.0143(9) 0.0200(10) 0.0166(9) -0.0013(7) 0.0000(7) -0.0009(7) 
C1 0.0183(11) 0.0254(12) 0.0173(10) 0.0001(9) -0.0001(8) 0.0033(9) 
C2 0.0183(12) 0.0243(12) 0.0220(11) 0.0017(9) 0.0038(9) 0.0041(9) 
C3 0.0198(12) 0.0303(14) 0.0265(12) 0.0049(10) 0.0000(9) 0.0081(10) 
C4 0.0215(13) 0.0307(14) 0.0217(12) 0.0026(10) -0.0038(9) 0.0041(10) 
C5 0.0173(11) 0.0191(11) 0.0186(10) 0.0021(8) -0.0001(8) 0.0000(9) 
C6 0.0177(11) 0.0211(12) 0.0173(10) 0.0012(9) 0.0001(8) -0.0018(9) 
C7 0.0216(12) 0.0282(13) 0.0188(11) 0.0009(9) -0.0021(9) -0.0005(10) 
C8 0.0258(13) 0.0316(14) 0.0162(11) -0.0029(9) -0.0009(9) -0.0047(11) 
C9 0.0222(12) 0.0244(12) 0.0196(11) -0.0038(9) 0.0065(9) -0.0067(10) 
C10 0.0164(11) 0.0210(12) 0.0198(11) -0.0016(9) 0.0031(8) -0.0017(9) 
C11 0.0266(13) 0.0253(13) 0.0181(11) 0.0076(9) -0.0019(9) 0.0005(10) 
C12 0.0238(13) 0.0232(12) 0.0196(11) 0.0060(9) -0.0041(9) 0.0020(10) 
C13 0.0178(12) 0.0259(13) 0.0235(11) 0.0019(9) 0.0035(9) 0.0042(9) 
C14 0.0170(12) 0.0264(13) 0.0242(12) -0.0004(9) 0.0013(9) -0.0008(9) 
C15 0.0293(14) 0.0209(12) 0.0210(11) -0.0027(9) 0.0008(10) -0.0029(10) 
C16 0.0221(12) 0.0246(12) 0.0176(11) -0.0030(9) -0.0007(9) -0.0022(9) 
C17 0.0254(14) 0.0307(14) 0.0296(13) -0.0035(11) 0.0043(10) 0.0111(11) 
C18 0.0283(14) 0.0343(15) 0.0255(13) -0.0102(11) 0.0069(10) -0.0037(11) 
P1 0.0248(4) 0.0331(4) 0.0274(3) -0.0081(3) -0.0048(3) 0.0068(3) 
F11A 0.0398(19) 0.052(3) 0.103(4) -0.041(2) -0.023(2) -0.0008(18) 
F12A 0.048(2) 0.079(3) 0.0279(15) 0.0150(18) -0.0068(12) 0.0046(19) 
F11B 0.040(5) 0.034(6) 0.070(7) -0.017(5) -0.015(5) -0.009(4) 
F12B 0.050(7) 0.090(9) 0.018(4) 0.008(5) 0.006(4) 0.019(6) 
F13 0.0322(10) 0.0645(14) 0.0628(13) -0.0380(11) -0.0183(9) 0.0233(10) 
F14 0.0419(11) 0.0338(10) 0.0560(12) -0.0126(9) 0.0118(9) -0.0022(8) 
F15 0.0604(16) 0.094(2) 0.0870(19) 0.0602(17) 0.0011(14) -0.0225(15) 
F16 0.0318(11) 0.0861(18) 0.0581(13) -0.0190(12) 0.0048(9) 0.0182(11) 
P2 0.0209(3) 0.0215(3) 0.0304(3) 0.0037(3) 0.0049(3) 0.0016(2) 
F21 0.0978(19) 0.0342(11) 0.0408(11) -0.0045(8) 0.0290(11) 0.0094(11) 
F22 0.0518(12) 0.0332(10) 0.0306(9) 0.0072(7) -0.0015(8) 0.0109(8) 
F23 0.0305(11) 0.0667(16) 0.112(2) 0.0442(15) 0.0217(12) -0.0048(11) 
F24 0.0190(8) 0.0598(13) 0.0357(9) 0.0099(8) 0.0015(7) -0.0010(8) 
F25 0.0224(8) 0.0313(9) 0.0566(11) 0.0156(8) 0.0032(7) 0.0054(7) 
F26 0.0718(15) 0.0326(10) 0.0368(10) -0.0060(8) -0.0215(9) 0.0103(10) 
  
_geom_special_details 
; 
All esds (except the esd in the dihedral angle 
between two l.s. planes) are estimated using the 
full covariance matrix. The cell esds are taken 
into account individually in the estimation of 
esds in distances, angles and torsion angles; 
correlations between esds in cell parameters are 
only used when they are defined by crystal symmetry.  
An approximate (isotropic) treatment of cell esds is 
used for estimating esds involving l.s. planes. 
 
; 
  
loop_ 
 _geom_bond_atom_site_label_1 
 _geom_bond_atom_site_label_2 
 _geom_bond_distance 
 _geom_bond_site_symmetry_2 
 _geom_bond_publ_flag 
Pt N1 2.050(2) . ? 
Pt N2 2.0512(19) . ? 
Pt S2 2.2686(6) . ? 
Pt S1 2.2692(6) . ? 
Pt S3 2.8532(6) . ? 
S1 C11 1.824(3) . ? 
S1 C16 1.833(3) . ? 
S2 C13 1.823(3) . ? 
S2 C12 1.835(2) . ? 
S3 C14 1.814(3) . ? 
S3 C15 1.817(3) . ? 
N1 C1 1.343(3) . ? 
N1 C5 1.364(3) . ? 
N2 C10 1.346(3) . ? 
N2 C6 1.362(3) . ? 
C1 C2 1.387(3) . ? 
C2 C3 1.387(4) . ? 
C2 C17 1.505(3) . ? 
C3 C4 1.391(4) . ? 
C4 C5 1.386(4) . ? 
C5 C6 1.470(3) . ? 
C6 C7 1.386(3) . ? 
C7 C8 1.393(4) . ? 
C8 C9 1.387(4) . ? 
C9 C10 1.386(3) . ? 
C9 C18 1.508(4) . ? 
C11 C12 1.512(4) . ? 
C13 C14 1.518(4) . ? 
C15 C16 1.517(4) . ? 
P1 F12B 1.449(10) . ? 
P1 F11A 1.568(4) . ? 
P1 F15 1.579(3) . ? 
P1 F16 1.593(2) . ? 
P1 F14 1.601(2) . ? 
P1 F13 1.601(2) . ? 
P1 F12A 1.649(4) . ? 
P1 F11B 1.758(11) . ? 
P2 F24 1.5880(18) . ? 
P2 F21 1.590(2) . ? 
P2 F23 1.597(2) . ? 
P2 F22 1.6026(18) . ? 
P2 F26 1.603(2) . ? 
P2 F25 1.6049(18) . ? 
  
loop_ 
 _geom_angle_atom_site_label_1 
 _geom_angle_atom_site_label_2 
 _geom_angle_atom_site_label_3 
 _geom_angle 
 _geom_angle_site_symmetry_1 
 _geom_angle_site_symmetry_3 
 _geom_angle_publ_flag 
N1 Pt N2 79.70(8) . . ? 
N1 Pt S2 173.13(6) . . ? 
N2 Pt S2 94.99(6) . . ? 
N1 Pt S1 96.04(6) . . ? 
N2 Pt S1 169.80(6) . . ? 
S2 Pt S1 88.47(2) . . ? 
N1 Pt S3 100.50(6) . . ? 
N2 Pt S3 103.88(6) . . ? 
S2 Pt S3 84.95(2) . . ? 
S1 Pt S3 85.96(2) . . ? 
C11 S1 C16 100.72(12) . . ? 
C11 S1 Pt 101.91(8) . . ? 
C16 S1 Pt 108.07(8) . . ? 
C13 S2 C12 102.82(12) . . ? 
C13 S2 Pt 105.10(9) . . ? 
C12 S2 Pt 106.25(9) . . ? 
C14 S3 C15 103.06(12) . . ? 
C14 S3 Pt 95.46(9) . . ? 
C15 S3 Pt 90.88(9) . . ? 
C1 N1 C5 119.2(2) . . ? 
C1 N1 Pt 125.79(16) . . ? 
C5 N1 Pt 115.03(16) . . ? 
C10 N2 C6 119.4(2) . . ? 
C10 N2 Pt 125.63(17) . . ? 
C6 N2 Pt 114.93(16) . . ? 
N1 C1 C2 123.2(2) . . ? 
C1 C2 C3 117.6(2) . . ? 
C1 C2 C17 119.9(2) . . ? 
C3 C2 C17 122.5(2) . . ? 
C2 C3 C4 119.7(2) . . ? 
C5 C4 C3 119.8(2) . . ? 
N1 C5 C4 120.4(2) . . ? 
N1 C5 C6 115.0(2) . . ? 
C4 C5 C6 124.6(2) . . ? 
N2 C6 C7 120.6(2) . . ? 
N2 C6 C5 115.2(2) . . ? 
C7 C6 C5 124.1(2) . . ? 
C6 C7 C8 119.2(2) . . ? 
C9 C8 C7 120.4(2) . . ? 
C10 C9 C8 117.4(2) . . ? 
C10 C9 C18 120.1(2) . . ? 
C8 C9 C18 122.5(2) . . ? 
N2 C10 C9 123.0(2) . . ? 
C12 C11 S1 112.02(17) . . ? 
C11 C12 S2 111.12(17) . . ? 
C14 C13 S2 117.75(18) . . ? 
C13 C14 S3 114.72(17) . . ? 
C16 C15 S3 118.07(18) . . ? 
C15 C16 S1 114.76(17) . . ? 
F12B P1 F15 158.9(6) . . ? 
F11A P1 F15 100.2(2) . . ? 
F12B P1 F16 91.1(5) . . ? 
F11A P1 F16 90.85(18) . . ? 
F15 P1 F16 89.27(16) . . ? 
F12B P1 F14 113.6(6) . . ? 
F11A P1 F14 172.0(2) . . ? 
F15 P1 F14 87.49(14) . . ? 
F16 P1 F14 91.64(12) . . ? 
F12B P1 F13 89.2(5) . . ? 
F11A P1 F13 89.36(17) . . ? 
F15 P1 F13 90.48(16) . . ? 
F16 P1 F13 179.71(12) . . ? 
F14 P1 F13 88.19(11) . . ? 
F11A P1 F12A 87.9(2) . . ? 
F15 P1 F12A 171.9(2) . . ? 
F16 P1 F12A 89.77(18) . . ? 
F14 P1 F12A 84.48(17) . . ? 
F13 P1 F12A 90.45(18) . . ? 
F12B P1 F11B 87.8(7) . . ? 
F15 P1 F11B 71.1(4) . . ? 
F16 P1 F11B 88.2(4) . . ? 
F14 P1 F11B 158.6(4) . . ? 
F13 P1 F11B 91.9(4) . . ? 
F24 P2 F21 89.57(12) . . ? 
F24 P2 F23 179.35(15) . . ? 
F21 P2 F23 89.80(15) . . ? 
F24 P2 F22 90.48(11) . . ? 
F21 P2 F22 90.09(11) . . ? 
F23 P2 F22 89.67(12) . . ? 
F24 P2 F26 90.32(12) . . ? 
F21 P2 F26 179.73(12) . . ? 
F23 P2 F26 90.30(15) . . ? 
F22 P2 F26 90.15(10) . . ? 
F24 P2 F25 89.59(10) . . ? 
F21 P2 F25 91.00(12) . . ? 
F23 P2 F25 90.27(11) . . ? 
F22 P2 F25 178.91(11) . . ? 
F26 P2 F25 88.76(10) . . ? 
  
  
_diffrn_measured_fraction_theta_max    0.998 
_diffrn_reflns_theta_full              28.32 
_diffrn_measured_fraction_theta_full   0.998 
_refine_diff_density_max    1.144 
_refine_diff_density_min   -0.815 
_refine_diff_density_rms    0.099 

# eof data_3 ================================================ 

  
data_4 
  
_audit_creation_method            SHELXL-97 
_chemical_name_systematic 
; 
4,4'-di-tert-butylbipyridine-(1,4,7-trithiacyclononane)platinum(II) 
bis(hexafluorophosphate) nitromethane solvate

; 
_chemical_name_common             ? 
_chemical_melting_point           ? 
_chemical_formula_moiety          ? 
_chemical_formula_sum             'C25 H39 F12 N3 O2 P2 Pt S3' 
_chemical_formula_weight          994.80 
  
loop_ 
 _atom_type_symbol 
 _atom_type_description 
 _atom_type_scat_dispersion_real 
 _atom_type_scat_dispersion_imag 
 _atom_type_scat_source 
 'C'  'C'   0.0033   0.0016 
 'International Tables Vol C Tables 4.2.6.8 and 6.1.1.4' 
 'H'  'H'   0.0000   0.0000 
 'International Tables Vol C Tables 4.2.6.8 and 6.1.1.4' 
 'N'  'N'   0.0061   0.0033 
 'International Tables Vol C Tables 4.2.6.8 and 6.1.1.4' 
 'F'  'F'   0.0171   0.0103 
 'International Tables Vol C Tables 4.2.6.8 and 6.1.1.4' 
 'P'  'P'   0.1023   0.0942 
 'International Tables Vol C Tables 4.2.6.8 and 6.1.1.4' 
 'S'  'S'   0.1246   0.1234 
 'International Tables Vol C Tables 4.2.6.8 and 6.1.1.4' 
 'Pt'  'Pt'  -1.7033   8.3905 
 'International Tables Vol C Tables 4.2.6.8 and 6.1.1.4' 
 'O'  'O'   0.0106   0.0060 
 'International Tables Vol C Tables 4.2.6.8 and 6.1.1.4' 
  
_symmetry_cell_setting            Triclinic 
_symmetry_space_group_name_H-M    P-1 
_symmetry_space_group_name_Hall   '-P 1'

  
loop_ 
 _symmetry_equiv_pos_as_xyz 
 'x, y, z' 
 '-x, -y, -z' 
  
_cell_length_a                    11.5422(7) 
_cell_length_b                    11.6100(7) 
_cell_length_c                    13.6052(9) 
_cell_angle_alpha                 85.902(1) 
_cell_angle_beta                  89.675(1) 
_cell_angle_gamma                 74.942(1) 
_cell_volume                      1755.90(19) 
_cell_formula_units_Z             2 
_cell_measurement_temperature     150(2) 
_cell_measurement_reflns_used     5901 
_cell_measurement_theta_min       2.74 
_cell_measurement_theta_max       28.00 
  
_exptl_crystal_description        'irregular plate' 
_exptl_crystal_colour             yellow-orange
_exptl_crystal_size_max           0.24 
_exptl_crystal_size_mid           0.22 
_exptl_crystal_size_min           0.15 
_exptl_crystal_density_meas       'not measured'  
_exptl_crystal_density_diffrn     1.882 
_exptl_crystal_density_method     ?
_exptl_crystal_F_000              980 
_exptl_absorpt_coefficient_mu     4.359 
_exptl_absorpt_correction_type    multi-scan 
_exptl_absorpt_correction_T_min   0.4210 
_exptl_absorpt_correction_T_max   0.5609 
_exptl_absorpt_process_details    'SADABS (Sheldrick)' 
  
_exptl_special_details 
; 
A suitable crystal was mounted on a Cryo-loop with paratone-N 
and immediately transferred to the goniostat bathed in a cold 
stream. 

The first 50 frames of data were recollected for a decay
correction. The decay correction was applied simultaneously
with the absorption correction in SADABS. No formal measure 
of the extent of decay is printed out by this program. 

The final unit cell is obtained from the refinement of
the XYZ weighted centroids of reflections above 20 \s(I).

Note that the absorption correction parameters Tmin and Tmax also 
reflect beam corrections, etc. As a result, the numerical values 
for Tmin and Tmax may differ from expected values based solely 
absorption effects and crystal size. 
; 
  
_diffrn_ambient_temperature       150(2) 
_diffrn_radiation_wavelength      0.71073 
_diffrn_radiation_type            MoK\a 
_diffrn_radiation_source          'sealed tube' 
_diffrn_radiation_monochromator   graphite 
_diffrn_measurement_device_type   'SMART 1K CCD'
_diffrn_measurement_method        '\w scans' 
_diffrn_detector_area_resol_mean  0.75 
_diffrn_standards_number          0 
_diffrn_standards_interval_count  ? 
_diffrn_standards_interval_time   ? 
_diffrn_standards_decay_%         ? 
_diffrn_reflns_number             18631 
_diffrn_reflns_av_R_equivalents   0.0354 
_diffrn_reflns_av_sigmaI/netI     0.0514 
_diffrn_reflns_limit_h_min        -15 
_diffrn_reflns_limit_h_max        15 
_diffrn_reflns_limit_k_min        -15 
_diffrn_reflns_limit_k_max        15 
_diffrn_reflns_limit_l_min        -17 
_diffrn_reflns_limit_l_max        17 
_diffrn_reflns_theta_min          2.62 
_diffrn_reflns_theta_max          28.00 
_reflns_number_total              8331 
_reflns_number_gt                 7403 
_reflns_threshold_expression      >2\s(I) 
  
_computing_data_collection        'Bruker SMART v5.6054' 
_computing_cell_refinement        'Bruker SAINT v6.02A'
_computing_data_reduction         'Bruker SAINT v6.02A' 
_computing_structure_solution     'Bruker SHELXTL v5.1, v6.12' 
_computing_structure_refinement   'Bruker SHELXTL v5.1, v6.12' 
_computing_molecular_graphics     
'Bruker SHELXTL v5.1, v6.12 and Crystal Impact DIAMOND v2.1e (1997)'
_computing_publication_material   'Bruker SHELXTL v5.1, v6.12' 
  
_refine_special_details 
; 
Refinement of F^2^ against ALL reflections.  The weighted 
R-factor wR and goodness of fit S are based on F^2^, 
conventional R-factors R are based on F, with F set to zero 
for negative F^2^. The threshold expression of F^2^ > 2\s(F^2^) 
is used only for calculating R-factors(gt) etc. and is 
not relevant to the choice of reflections for refinement.  
R-factors based on F^2^ are statistically about twice as large 
as those based on F, and R-factors based on ALL data will be 
even larger. 

The H-atoms on the cation were either located directly
from the difference map or calculated based on geometric
criteria and were treated with a riding model in 
subsequent refinements. The Uiso for these atoms were
defined as a*Ueq of the adjacent atom (a=1.5 for methyl 
and 1.2 for all others). 

A molecule of nitromethane is incorporated in the lattice.
; 

_refine_ls_structure_factor_coef  Fsqd 
_refine_ls_matrix_type            full 
_refine_ls_weighting_scheme       calc 
_refine_ls_weighting_details 
 'calc w=1/[\s^2^(Fo^2^)+(0.0221P)^2^+0.4417P] where P=(Fo^2^+2Fc^2^)/3' 
_atom_sites_solution_primary      Patterson 
_atom_sites_solution_secondary    difmap 
_atom_sites_solution_hydrogens    mixed 
_refine_ls_hydrogen_treatment     constr 
_refine_ls_extinction_method      none 
_refine_ls_extinction_coef        ? 
_refine_ls_number_reflns          8331 
_refine_ls_number_parameters      434 
_refine_ls_number_restraints      0 
_refine_ls_R_factor_all           0.0383 
_refine_ls_R_factor_gt            0.0306 
_refine_ls_wR_factor_ref          0.0640 
_refine_ls_wR_factor_gt           0.0621 
_refine_ls_goodness_of_fit_ref    1.058 
_refine_ls_restrained_S_all       1.058 
_refine_ls_shift/su_max           0.003 
_refine_ls_shift/su_mean          0.000 
  
loop_ 
 _atom_site_label 
 _atom_site_type_symbol 
 _atom_site_fract_x 
 _atom_site_fract_y 
 _atom_site_fract_z 
 _atom_site_U_iso_or_equiv 
 _atom_site_adp_type 
 _atom_site_occupancy 
 _atom_site_symmetry_multiplicity 
 _atom_site_calc_flag 
 _atom_site_refinement_flags 
 _atom_site_disorder_assembly 
 _atom_site_disorder_group 
Pt Pt 0.684041(11) 0.830970(12) 0.668711(10) 0.01595(4) Uani 1 1 d . . . 
S1 S 0.71299(8) 0.64245(8) 0.61947(7) 0.01935(18) Uani 1 1 d . . . 
S2 S 0.87561(8) 0.82363(8) 0.62292(7) 0.0230(2) Uani 1 1 d . . . 
S3 S 0.63102(9) 0.89798(9) 0.45621(7) 0.0278(2) Uani 1 1 d . . . 
N1 N 0.5212(3) 0.8393(3) 0.7312(2) 0.0182(6) Uani 1 1 d . . . 
N2 N 0.6514(3) 0.9912(3) 0.7308(2) 0.0179(6) Uani 1 1 d . . . 
C1 C 0.4615(3) 0.7537(3) 0.7304(3) 0.0241(8) Uani 1 1 d . . . 
H1 H 0.4960 0.6836 0.6975 0.029 Uiso 1 1 calc R . . 
C2 C 0.3521(3) 0.7640(3) 0.7755(3) 0.0245(8) Uani 1 1 d . . . 
H2 H 0.3127 0.7019 0.7727 0.029 Uiso 1 1 calc R . . 
C3 C 0.2997(3) 0.8647(3) 0.8248(3) 0.0193(7) Uani 1 1 d . . . 
C4 C 0.3612(3) 0.9535(3) 0.8237(3) 0.0213(8) Uani 1 1 d . . . 
H4 H 0.3276 1.0245 0.8557 0.026 Uiso 1 1 calc R . . 
C5 C 0.4697(3) 0.9402(3) 0.7771(2) 0.0160(7) Uani 1 1 d . . . 
C6 C 0.5425(3) 1.0278(3) 0.7746(2) 0.0171(7) Uani 1 1 d . . . 
C7 C 0.5070(3) 1.1377(3) 0.8136(3) 0.0208(8) Uani 1 1 d . . . 
H7 H 0.4304 1.1612 0.8431 0.025 Uiso 1 1 calc R . . 
C8 C 0.5818(3) 1.2154(3) 0.8103(3) 0.0213(8) Uani 1 1 d . . . 
C9 C 0.6935(3) 1.1736(3) 0.7685(3) 0.0240(8) Uani 1 1 d . . . 
H9 H 0.7490 1.2216 0.7667 0.029 Uiso 1 1 calc R . . 
C10 C 0.7247(3) 1.0647(3) 0.7298(3) 0.0228(8) Uani 1 1 d . . . 
H10 H 0.8014 1.0396 0.7008 0.027 Uiso 1 1 calc R . . 
C11 C 0.8712(3) 0.5934(3) 0.5862(3) 0.0250(8) Uani 1 1 d . . . 
H11A H 0.9026 0.5071 0.6057 0.030 Uiso 1 1 calc R . . 
H11B H 0.8789 0.6052 0.5139 0.030 Uiso 1 1 calc R . . 
C12 C 0.9432(3) 0.6634(3) 0.6369(3) 0.0252(8) Uani 1 1 d . . . 
H12A H 1.0249 0.6460 0.6093 0.030 Uiso 1 1 calc R . . 
H12B H 0.9507 0.6370 0.7079 0.030 Uiso 1 1 calc R . . 
C13 C 0.8829(4) 0.8477(4) 0.4879(3) 0.0343(10) Uani 1 1 d . . . 
H13A H 0.9527 0.8801 0.4724 0.041 Uiso 1 1 calc R . . 
H13B H 0.8983 0.7690 0.4597 0.041 Uiso 1 1 calc R . . 
C14 C 0.7749(4) 0.9293(4) 0.4370(3) 0.0361(10) Uani 1 1 d . . . 
H14A H 0.7901 0.9306 0.3653 0.043 Uiso 1 1 calc R . . 
H14B H 0.7682 1.0110 0.4571 0.043 Uiso 1 1 calc R . . 
C15 C 0.6570(4) 0.7458(3) 0.4224(3) 0.0291(9) Uani 1 1 d . . . 
H15A H 0.6055 0.7453 0.3646 0.035 Uiso 1 1 calc R . . 
H15B H 0.7415 0.7178 0.4018 0.035 Uiso 1 1 calc R . . 
C16 C 0.6333(3) 0.6573(3) 0.5027(3) 0.0261(8) Uani 1 1 d . . . 
H16A H 0.6522 0.5775 0.4760 0.031 Uiso 1 1 calc R . . 
H16B H 0.5462 0.6798 0.5163 0.031 Uiso 1 1 calc R . . 
C17 C 0.1780(3) 0.8771(4) 0.8749(3) 0.0252(8) Uani 1 1 d . . . 
C18 C 0.5394(4) 1.3399(3) 0.8499(3) 0.0264(9) Uani 1 1 d . . . 
C19 C 0.0798(3) 0.9501(4) 0.8041(3) 0.0333(10) Uani 1 1 d . . . 
H19A H 0.0793 0.9072 0.7447 0.050 Uiso 1 1 calc R . . 
H19B H 0.0952 1.0279 0.7860 0.050 Uiso 1 1 calc R . . 
H19C H 0.0017 0.9620 0.8362 0.050 Uiso 1 1 calc R . . 
C20 C 0.1756(4) 0.9428(5) 0.9702(3) 0.0422(12) Uani 1 1 d . . . 
H20A H 0.1574 1.0292 0.9535 0.063 Uiso 1 1 calc R . . 
H20B H 0.2541 0.9156 1.0035 0.063 Uiso 1 1 calc R . . 
H20C H 0.1138 0.9251 1.0141 0.063 Uiso 1 1 calc R . . 
C21 C 0.1548(4) 0.7546(4) 0.9005(4) 0.0386(11) Uani 1 1 d . . . 
H21A H 0.2245 0.7022 0.9362 0.039 Uiso 1 1 calc R . . 
H21B H 0.1412 0.7191 0.8398 0.058 Uiso 1 1 calc R . . 
H21C H 0.0837 0.7640 0.9421 0.058 Uiso 1 1 calc R . . 
C22 C 0.5100(4) 1.3237(4) 0.9594(3) 0.0366(11) Uani 1 1 d . . . 
H22A H 0.5835 1.2828 0.9964 0.055 Uiso 1 1 calc R . . 
H22B H 0.4516 1.2757 0.9669 0.055 Uiso 1 1 calc R . . 
H22C H 0.4761 1.4022 0.9847 0.055 Uiso 1 1 calc R . . 
C23 C 0.4273(5) 1.4113(4) 0.7922(4) 0.0544(15) Uani 1 1 d . . . 
H23A H 0.3921 1.4854 0.8239 0.082 Uiso 1 1 calc R . . 
H23B H 0.3688 1.3635 0.7911 0.082 Uiso 1 1 calc R . . 
H23C H 0.4493 1.4307 0.7245 0.082 Uiso 1 1 calc R . . 
C24 C 0.6359(4) 1.4093(4) 0.8393(3) 0.0376(11) Uani 1 1 d . . . 
H24A H 0.7062 1.3675 0.8799 0.056 Uiso 1 1 calc R . . 
H24B H 0.6037 1.4899 0.8612 0.056 Uiso 1 1 calc R . . 
H24C H 0.6593 1.4148 0.7702 0.056 Uiso 1 1 calc R . . 
P1 P 0.73812(9) 1.29121(9) 0.49523(8) 0.0262(2) Uani 1 1 d . . . 
F11 F 0.6542(2) 1.2010(2) 0.4924(2) 0.0473(7) Uani 1 1 d . . . 
F12 F 0.6604(2) 1.3559(2) 0.58236(18) 0.0416(6) Uani 1 1 d . . . 
F13 F 0.6508(2) 1.3816(2) 0.41656(18) 0.0377(6) Uani 1 1 d . . . 
F14 F 0.8215(2) 1.3818(2) 0.49766(19) 0.0400(6) Uani 1 1 d . . . 
F15 F 0.8263(2) 1.2002(2) 0.57249(19) 0.0430(7) Uani 1 1 d . . . 
F16 F 0.8164(2) 1.2271(2) 0.40733(18) 0.0372(6) Uani 1 1 d . . . 
P2 P 1.05694(11) 0.33829(11) 0.78990(9) 0.0375(3) Uani 1 1 d . . . 
F21 F 0.9268(3) 0.4306(3) 0.7832(2) 0.0601(9) Uani 1 1 d . . . 
F22 F 1.1866(3) 0.2461(3) 0.7940(2) 0.0722(10) Uani 1 1 d . . . 
F23 F 1.0853(3) 0.3908(3) 0.6824(2) 0.0658(10) Uani 1 1 d . . . 
F24 F 1.1085(3) 0.4360(3) 0.8362(3) 0.0818(11) Uani 1 1 d . . . 
F25 F 1.0038(3) 0.2449(3) 0.7392(3) 0.0840(11) Uani 1 1 d . . . 
F26 F 1.0300(3) 0.2850(3) 0.8952(2) 0.0735(10) Uani 1 1 d . . . 
O1 O 0.1441(3) 1.1835(3) 1.1263(2) 0.0521(9) Uani 1 1 d . . . 
O2 O 0.3030(3) 1.1722(3) 1.0410(3) 0.0604(10) Uani 1 1 d . . . 
N3 N 0.2113(3) 1.2294(4) 1.0786(3) 0.0390(9) Uani 1 1 d . . . 
C25 C 0.1845(5) 1.3612(4) 1.0686(4) 0.0530(13) Uani 1 1 d . . . 
H25A H 0.2050 1.3873 1.0022 0.080 Uiso 1 1 calc R . . 
H25B H 0.2318 1.3883 1.1174 0.080 Uiso 1 1 calc R . . 
H25C H 0.0989 1.3955 1.0797 0.080 Uiso 1 1 calc R . . 
 
loop_ 
 _atom_site_aniso_label 
 _atom_site_aniso_U_11 
 _atom_site_aniso_U_22 
 _atom_site_aniso_U_33 
 _atom_site_aniso_U_23 
 _atom_site_aniso_U_13 
 _atom_site_aniso_U_12 
Pt 0.01546(7) 0.01455(7) 0.01832(7) -0.00379(5) 0.00236(5) -0.00411(5) 
S1 0.0190(4) 0.0150(4) 0.0240(5) -0.0042(3) 0.0018(4) -0.0037(3) 
S2 0.0176(4) 0.0226(5) 0.0298(5) -0.0058(4) 0.0039(4) -0.0063(4) 
S3 0.0319(5) 0.0219(5) 0.0241(5) -0.0019(4) -0.0008(4) 0.0029(4) 
N1 0.0204(15) 0.0176(15) 0.0174(15) -0.0040(12) 0.0006(12) -0.0056(12) 
N2 0.0191(14) 0.0163(15) 0.0185(15) -0.0005(12) 0.0008(12) -0.0053(12) 
C1 0.0260(19) 0.0212(19) 0.028(2) -0.0082(16) 0.0040(16) -0.0094(16) 
C2 0.0264(19) 0.028(2) 0.023(2) -0.0056(16) 0.0040(16) -0.0129(16) 
C3 0.0190(17) 0.0228(19) 0.0160(17) 0.0001(14) 0.0007(14) -0.0057(15) 
C4 0.0207(18) 0.0201(19) 0.0220(19) -0.0023(15) 0.0021(15) -0.0030(15) 
C5 0.0151(16) 0.0142(17) 0.0180(17) -0.0024(13) -0.0016(13) -0.0023(13) 
C6 0.0179(17) 0.0186(18) 0.0149(17) -0.0002(13) -0.0014(13) -0.0053(14) 
C7 0.0201(18) 0.0182(18) 0.0242(19) -0.0069(15) 0.0024(15) -0.0039(14) 
C8 0.031(2) 0.0159(18) 0.0171(18) -0.0026(14) -0.0011(15) -0.0058(15) 
C9 0.030(2) 0.0211(19) 0.025(2) -0.0035(15) 0.0027(16) -0.0141(16) 
C10 0.0237(18) 0.024(2) 0.0237(19) -0.0056(15) 0.0049(15) -0.0104(16) 
C11 0.0204(18) 0.021(2) 0.031(2) -0.0050(16) 0.0007(16) -0.0007(15) 
C12 0.0196(18) 0.0201(19) 0.034(2) -0.0052(16) -0.0006(16) -0.0004(15) 
C13 0.034(2) 0.033(2) 0.037(2) 0.0003(19) 0.0121(19) -0.0117(19) 
C14 0.048(3) 0.029(2) 0.031(2) 0.0034(18) 0.012(2) -0.011(2) 
C15 0.037(2) 0.028(2) 0.020(2) -0.0086(16) -0.0012(17) -0.0021(18) 
C16 0.0235(19) 0.024(2) 0.032(2) -0.0107(17) -0.0021(16) -0.0048(16) 
C17 0.0203(18) 0.031(2) 0.024(2) -0.0057(16) 0.0079(16) -0.0066(16) 
C18 0.035(2) 0.0142(18) 0.031(2) -0.0066(16) -0.0009(17) -0.0071(16) 
C19 0.026(2) 0.037(2) 0.036(2) -0.0020(19) 0.0026(18) -0.0077(18) 
C20 0.032(2) 0.062(3) 0.036(3) -0.020(2) 0.015(2) -0.013(2) 
C21 0.028(2) 0.039(3) 0.048(3) 0.006(2) 0.014(2) -0.0098(19) 
C22 0.048(3) 0.034(2) 0.036(2) -0.018(2) 0.019(2) -0.022(2) 
C23 0.064(3) 0.020(2) 0.075(4) -0.016(2) -0.026(3) 0.002(2) 
C24 0.058(3) 0.026(2) 0.039(3) -0.0137(19) 0.014(2) -0.025(2) 
P1 0.0248(5) 0.0226(5) 0.0327(6) -0.0061(4) 0.0054(4) -0.0081(4) 
F11 0.0301(13) 0.0280(14) 0.087(2) -0.0076(14) 0.0099(14) -0.0133(11) 
F12 0.0365(14) 0.0477(16) 0.0363(14) -0.0076(12) 0.0135(12) -0.0025(12) 
F13 0.0472(15) 0.0268(13) 0.0372(14) -0.0052(11) -0.0059(12) -0.0054(11) 
F14 0.0426(14) 0.0376(14) 0.0499(16) -0.0182(12) 0.0101(12) -0.0250(12) 
F15 0.0277(13) 0.0495(16) 0.0446(15) 0.0078(13) 0.0047(11) 0.0001(12) 
F16 0.0392(14) 0.0342(14) 0.0413(15) -0.0187(11) 0.0127(12) -0.0114(11) 
P2 0.0451(7) 0.0317(6) 0.0296(6) 0.0006(5) 0.0046(5) 0.0000(5) 
F21 0.0532(17) 0.0541(19) 0.0605(19) 0.0054(15) 0.0248(15) 0.0054(14) 
F22 0.0543(18) 0.063(2) 0.076(2) 0.0244(18) 0.0017(17) 0.0182(16) 
F23 0.0610(19) 0.064(2) 0.0434(17) 0.0175(15) 0.0228(15) 0.0292(16) 
F24 0.103(3) 0.075(2) 0.080(3) -0.017(2) -0.001(2) -0.042(2) 
F25 0.107(3) 0.052(2) 0.092(3) -0.0179(19) -0.031(2) -0.015(2) 
F26 0.082(2) 0.087(3) 0.0462(19) 0.0212(17) 0.0143(17) -0.020(2) 
O1 0.0370(18) 0.082(3) 0.044(2) 0.0118(19) -0.0041(15) -0.0330(18) 
O2 0.050(2) 0.050(2) 0.084(3) -0.013(2) 0.023(2) -0.0171(18) 
N3 0.035(2) 0.050(3) 0.035(2) -0.0022(18) -0.0058(17) -0.0185(19) 
C25 0.057(3) 0.049(3) 0.050(3) -0.008(3) 0.001(3) -0.007(3) 
 
_geom_special_details 
; 
 All esds (except the esd in the dihedral angle between two l.s. planes) 
 are estimated using the full covariance matrix.  The cell esds are taken 
 into account individually in the estimation of esds in distances, angles 
 and torsion angles; correlations between esds in cell parameters are only 
 used when they are defined by crystal symmetry.  An approximate (isotropic) 
 treatment of cell esds is used for estimating esds involving l.s. planes. 
; 
 
loop_ 
 _geom_bond_atom_site_label_1 
 _geom_bond_atom_site_label_2 
 _geom_bond_distance 
 _geom_bond_site_symmetry_2 
 _geom_bond_publ_flag 
Pt N1 2.040(3) . ? 
Pt N2 2.043(3) . ? 
Pt S1 2.2755(9) . ? 
Pt S2 2.2756(9) . ? 
S1 C16 1.816(4) . ? 
S1 C11 1.830(4) . ? 
S2 C12 1.818(4) . ? 
S2 C13 1.842(4) . ? 
S3 C14 1.803(4) . ? 
S3 C15 1.807(4) . ? 
N1 C1 1.349(5) . ? 
N1 C5 1.363(4) . ? 
N2 C10 1.348(4) . ? 
N2 C6 1.366(4) . ? 
C1 C2 1.381(5) . ? 
C2 C3 1.387(5) . ? 
C3 C4 1.395(5) . ? 
C3 C17 1.535(5) . ? 
C4 C5 1.379(5) . ? 
C5 C6 1.476(5) . ? 
C6 C7 1.379(5) . ? 
C7 C8 1.399(5) . ? 
C8 C9 1.389(5) . ? 
C8 C18 1.536(5) . ? 
C9 C10 1.365(5) . ? 
C11 C12 1.505(5) . ? 
C13 C14 1.495(6) . ? 
C15 C16 1.519(6) . ? 
C17 C19 1.525(6) . ? 
C17 C21 1.531(6) . ? 
C17 C20 1.548(6) . ? 
C18 C23 1.530(6) . ? 
C18 C22 1.535(5) . ? 
C18 C24 1.535(5) . ? 
P1 F12 1.594(2) . ? 
P1 F15 1.598(3) . ? 
P1 F13 1.602(3) . ? 
P1 F16 1.602(2) . ? 
P1 F14 1.602(2) . ? 
P1 F11 1.603(3) . ? 
P2 F25 1.576(4) . ? 
P2 F24 1.580(4) . ? 
P2 F26 1.581(3) . ? 
P2 F22 1.596(3) . ? 
P2 F21 1.602(3) . ? 
P2 F23 1.609(3) . ? 
O1 N3 1.211(4) . ? 
O2 N3 1.224(5) . ? 
N3 C25 1.477(6) . ? 
 
loop_ 
 _geom_angle_atom_site_label_1 
 _geom_angle_atom_site_label_2 
 _geom_angle_atom_site_label_3 
 _geom_angle 
 _geom_angle_site_symmetry_1 
 _geom_angle_site_symmetry_3 
 _geom_angle_publ_flag 
N1 Pt N2 79.02(11) . . ? 
N1 Pt S1 95.68(8) . . ? 
N2 Pt S1 172.25(8) . . ? 
N1 Pt S2 171.20(8) . . ? 
N2 Pt S2 96.37(8) . . ? 
S1 Pt S2 88.12(3) . . ? 
C16 S1 C11 103.86(18) . . ? 
C16 S1 Pt 106.30(13) . . ? 
C11 S1 Pt 106.20(13) . . ? 
C12 S2 C13 99.42(19) . . ? 
C12 S2 Pt 100.59(12) . . ? 
C13 S2 Pt 110.10(14) . . ? 
C14 S3 C15 103.2(2) . . ? 
C1 N1 C5 118.1(3) . . ? 
C1 N1 Pt 125.4(2) . . ? 
C5 N1 Pt 116.5(2) . . ? 
C10 N2 C6 117.7(3) . . ? 
C10 N2 Pt 126.5(2) . . ? 
C6 N2 Pt 115.8(2) . . ? 
N1 C1 C2 122.6(3) . . ? 
C1 C2 C3 120.2(4) . . ? 
C2 C3 C4 116.7(3) . . ? 
C2 C3 C17 120.6(3) . . ? 
C4 C3 C17 122.7(3) . . ? 
C5 C4 C3 121.3(3) . . ? 
N1 C5 C4 121.1(3) . . ? 
N1 C5 C6 113.9(3) . . ? 
C4 C5 C6 125.0(3) . . ? 
N2 C6 C7 121.2(3) . . ? 
N2 C6 C5 114.6(3) . . ? 
C7 C6 C5 124.2(3) . . ? 
C6 C7 C8 121.1(3) . . ? 
C9 C8 C7 116.2(3) . . ? 
C9 C8 C18 123.0(3) . . ? 
C7 C8 C18 120.8(3) . . ? 
C10 C9 C8 120.8(3) . . ? 
N2 C10 C9 122.9(3) . . ? 
C12 C11 S1 110.3(2) . . ? 
C11 C12 S2 112.5(3) . . ? 
C14 C13 S2 116.7(3) . . ? 
C13 C14 S3 118.7(3) . . ? 
C16 C15 S3 115.3(3) . . ? 
C15 C16 S1 118.1(3) . . ? 
C19 C17 C21 109.0(3) . . ? 
C19 C17 C3 108.5(3) . . ? 
C21 C17 C3 111.2(3) . . ? 
C19 C17 C20 109.4(3) . . ? 
C21 C17 C20 109.2(4) . . ? 
C3 C17 C20 109.5(3) . . ? 
C23 C18 C22 110.1(4) . . ? 
C23 C18 C24 108.6(4) . . ? 
C22 C18 C24 109.1(3) . . ? 
C23 C18 C8 109.0(3) . . ? 
C22 C18 C8 108.1(3) . . ? 
C24 C18 C8 111.9(3) . . ? 
F12 P1 F15 91.07(14) . . ? 
F12 P1 F13 89.71(13) . . ? 
F15 P1 F13 179.21(15) . . ? 
F12 P1 F16 179.58(15) . . ? 
F15 P1 F16 89.17(14) . . ? 
F13 P1 F16 90.04(14) . . ? 
F12 P1 F14 89.86(14) . . ? 
F15 P1 F14 90.05(15) . . ? 
F13 P1 F14 89.97(14) . . ? 
F16 P1 F14 89.80(13) . . ? 
F12 P1 F11 90.13(14) . . ? 
F15 P1 F11 90.27(15) . . ? 
F13 P1 F11 89.71(15) . . ? 
F16 P1 F11 90.21(14) . . ? 
F14 P1 F11 179.68(18) . . ? 
F25 P2 F24 177.3(2) . . ? 
F25 P2 F26 90.6(2) . . ? 
F24 P2 F26 91.8(2) . . ? 
F25 P2 F22 90.1(2) . . ? 
F24 P2 F22 91.1(2) . . ? 
F26 P2 F22 89.50(18) . . ? 
F25 P2 F21 89.21(19) . . ? 
F24 P2 F21 89.5(2) . . ? 
F26 P2 F21 91.56(17) . . ? 
F22 P2 F21 178.74(19) . . ? 
F25 P2 F23 89.0(2) . . ? 
F24 P2 F23 88.6(2) . . ? 
F26 P2 F23 179.28(19) . . ? 
F22 P2 F23 89.91(16) . . ? 
F21 P2 F23 89.03(15) . . ? 
O1 N3 O2 123.4(4) . . ? 
O1 N3 C25 118.5(4) . . ? 
O2 N3 C25 118.0(4) . . ?   
  
_diffrn_measured_fraction_theta_max    0.981 
_diffrn_reflns_theta_full              28.00 
_diffrn_measured_fraction_theta_full   0.981 
_refine_diff_density_max    1.232 
_refine_diff_density_min   -0.812 
_refine_diff_density_rms    0.121 

# eof data_4 ================================================ 

  
 
data_5 
 
_audit_creation_method            SHELXL-97 
_chemical_name_systematic 
; 
5,5'-di-trifluromethanebipyridine-(1,4,7-trithiacyclononane)platinum(II) 
bis(hexafluorophosphate) acetonitrile solvate
; 
_chemical_name_common             ? 
_chemical_melting_point           ? 
_chemical_formula_moiety          ? 
_chemical_formula_sum             'C20 H21 F18 N3 P2 Pt S3' 
_chemical_formula_weight          998.61 
 
loop_ 
 _atom_type_symbol 
 _atom_type_description 
 _atom_type_scat_dispersion_real 
 _atom_type_scat_dispersion_imag 
 _atom_type_scat_source 
 'C'  'C'   0.0033   0.0016 
 'International Tables Vol C Tables 4.2.6.8 and 6.1.1.4' 
 'H'  'H'   0.0000   0.0000 
 'International Tables Vol C Tables 4.2.6.8 and 6.1.1.4' 
 'N'  'N'   0.0061   0.0033 
 'International Tables Vol C Tables 4.2.6.8 and 6.1.1.4' 
 'F'  'F'   0.0171   0.0103 
 'International Tables Vol C Tables 4.2.6.8 and 6.1.1.4' 
 'P'  'P'   0.1023   0.0942 
 'International Tables Vol C Tables 4.2.6.8 and 6.1.1.4' 
 'S'  'S'   0.1246   0.1234 
 'International Tables Vol C Tables 4.2.6.8 and 6.1.1.4' 
 'Pt'  'Pt'  -1.7033   8.3905 
 'International Tables Vol C Tables 4.2.6.8 and 6.1.1.4' 
 
_symmetry_cell_setting            Monoclinic 
_symmetry_space_group_name_H-M    P2(1)/c 
_symmetry_space_group_name_Hall   '-P 2ybc'

 
loop_ 
 _symmetry_equiv_pos_as_xyz 
 'x, y, z' 
 '-x, y+1/2, -z+1/2' 
 '-x, -y, -z' 
 'x, -y-1/2, z-1/2' 
 
_cell_length_a                    13.1187(9) 
_cell_length_b                    20.9031(15) 
_cell_length_c                    11.3815(8) 
_cell_angle_alpha                 90.00 
_cell_angle_beta                  105.789(2) 
_cell_angle_gamma                 90.00 
_cell_volume                      3003.3(4) 
_cell_formula_units_Z             4 
_cell_measurement_temperature     150(2) 
_cell_measurement_reflns_used     6688 
_cell_measurement_theta_min       1.61 
_cell_measurement_theta_max       26.37 
 
_exptl_crystal_description        needle 
_exptl_crystal_colour             red
_exptl_crystal_size_max           0.15 
_exptl_crystal_size_mid           0.03 
_exptl_crystal_size_min           0.02 
_exptl_crystal_density_meas       'not measured'  
_exptl_crystal_density_diffrn     2.209 
_exptl_crystal_density_method     ?
_exptl_crystal_F_000              1920 
_exptl_absorpt_coefficient_mu     5.120 
_exptl_absorpt_correction_type    multi-scan 
_exptl_absorpt_correction_T_min   0.5139 
_exptl_absorpt_correction_T_max   0.9045 
_exptl_absorpt_process_details    'SADABS (Sheldrick)' 
  
_exptl_special_details 
; 
 A suitable crystal was mounted on a Cryo-loop with paratone-N 
and immediately transferred to the goniostat bathed in a cold 
stream. 

The first 50 frames of data were recollected for a decay
correction. The decay correction was applied simultaneously
with the absorption correction in SADABS. No formal measure 
of the extent of decay is printed out by this program. 

The final unit cell is obtained from the refinement of
the XYZ weighted centroids of reflections above 20 \s(I).

Note that the absorption correction parameters Tmin and Tmax also 
reflect beam corrections, etc. As a result, the numerical values 
for Tmin and Tmax may differ from expected values based solely 
absorption effects and crystal size. 
; 
  
_diffrn_ambient_temperature       150(2) 
_diffrn_radiation_wavelength      0.71073 
_diffrn_radiation_type            MoK\a 
_diffrn_radiation_source          'fine-focus sealed tube' 
_diffrn_radiation_monochromator   graphite 
_diffrn_measurement_device_type   'SMART6000 CCD' 
_diffrn_measurement_method        '\w scans' 
_diffrn_detector_area_resol_mean  0.80 
_diffrn_standards_number          0 
_diffrn_standards_interval_count  ? 
_diffrn_standards_interval_time   ? 
_diffrn_standards_decay_%         ? 
_diffrn_reflns_number             31161 
_diffrn_reflns_av_R_equivalents   0.0634 
_diffrn_reflns_av_sigmaI/netI     0.0459 
_diffrn_reflns_limit_h_min        -16 
_diffrn_reflns_limit_h_max        16 
_diffrn_reflns_limit_k_min        -26 
_diffrn_reflns_limit_k_max        26 
_diffrn_reflns_limit_l_min        -14 
_diffrn_reflns_limit_l_max        14 
_diffrn_reflns_theta_min          1.61 
_diffrn_reflns_theta_max          26.37 
_reflns_number_total              6153 
_reflns_number_gt                 4673 
_reflns_threshold_expression      >2\s(I) 
 
_computing_data_collection        'Bruker SMART v5.628' 
_computing_cell_refinement        'Bruker SAINT v6.36A'
_computing_data_reduction         'Bruker SAINT v6.36A' 
_computing_structure_solution     'Bruker SHELXTL v6.12' 
_computing_structure_refinement   'Bruker SHELXTL v6.12' 
_computing_molecular_graphics     
'Bruker SHELXTL v6.12 and Crystal Impact DIAMOND v2.1e (1997)'
_computing_publication_material   'Bruker SHELXTL v6.12' 
  
_refine_special_details 
; 
Refinement of F^2^ against ALL reflections.  The weighted 
R-factor wR and goodness of fit S are based on F^2^, 
conventional R-factors R are based on F, with F set to zero 
for negative F^2^. The threshold expression of F^2^ > 2\s(F^2^) 
is used only for calculating R-factors(gt) etc. and is 
not relevant to the choice of reflections for refinement.  
R-factors based on F^2^ are statistically about twice as large 
as those based on F, and R-factors based on ALL data will be 
even larger. 

The H-atoms on the cation were either located directly
from the difference map or calculated based on geometric
criteria and were treated with a riding model in 
subsequent refinements. The Uiso for these atoms were
defined as a*Ueq of the adjacent atom (a=1.5 for methyl 
and 1.2 for all others). 

The PF~6~ anions show typical disorder, reasonable disorder 
models are presentdd with occupancies in the range 50-65% for 
the major component. Additionally one fo the CF~3~ groups on the
cation is disordered, a reasonable disorder model is also given 
with the major component having occupancies in the range 65-70%.
The anisotropic displacement parameters for the disordered CF~3~
group were held equivalent to the better behaved F4-F6. The bond
distances for the disordered CF~3~ group were also restrained to
avoid becoming too short. The largest residual electron density
peaks are in the area of the disordered CF~3~ group.

One molecule of acetonitrile is incorporated in the lattice.
; 
  
_refine_ls_structure_factor_coef  Fsqd  
_refine_ls_matrix_type            full 
_refine_ls_weighting_scheme       calc  
_refine_ls_weighting_details 
 'calc w=1/[\s^2^(Fo^2^)+(0.0315P)^2^+17.4373P] where P=(Fo^2^+2Fc^2^)/3' 
_atom_sites_solution_primary      Patterson 
_atom_sites_solution_secondary    difmap 
_atom_sites_solution_hydrogens    mixed 
_refine_ls_hydrogen_treatment     constr 
_refine_ls_extinction_method      none 
_refine_ls_extinction_coef        ? 
_refine_ls_number_reflns          6153 
_refine_ls_number_parameters      460 
_refine_ls_number_restraints      6 
_refine_ls_R_factor_all           0.0609 
_refine_ls_R_factor_gt            0.0358 
_refine_ls_wR_factor_ref          0.0882 
_refine_ls_wR_factor_gt           0.0767 
_refine_ls_goodness_of_fit_ref    1.042 
_refine_ls_restrained_S_all       1.055 
_refine_ls_shift/su_max           0.002 
_refine_ls_shift/su_mean          0.000 
 
loop_ 
 _atom_site_label 
 _atom_site_type_symbol 
 _atom_site_fract_x 
 _atom_site_fract_y 
 _atom_site_fract_z 
 _atom_site_U_iso_or_equiv 
 _atom_site_adp_type 
 _atom_site_occupancy 
 _atom_site_symmetry_multiplicity 
 _atom_site_calc_flag 
 _atom_site_refinement_flags 
 _atom_site_disorder_assembly 
 _atom_site_disorder_group 
Pt Pt 0.71650(2) 0.925598(11) 0.19630(2) 0.01946(8) Uani 1 1 d . . . 
S1 S 0.68977(13) 0.88847(8) 0.37238(14) 0.0240(3) Uani 1 1 d . . . 
S2 S 0.64642(14) 0.83258(8) 0.10533(15) 0.0243(3) Uani 1 1 d . . . 
S3 S 0.49114(14) 0.96308(8) 0.14147(16) 0.0294(4) Uani 1 1 d . . . 
N1 N 0.8018(4) 1.0042(2) 0.2768(5) 0.0217(11) Uani 1 1 d . . . 
N2 N 0.7638(4) 0.9613(3) 0.0515(5) 0.0227(12) Uani 1 1 d . . . 
F1A F 0.8538(15) 1.1197(9) 0.6237(13) 0.0556(11) Uani 0.30 1 d PD A 1 
F2A F 0.9861(13) 1.0625(8) 0.6413(14) 0.0495(10) Uani 0.30 1 d PD A 1 
F3A F 1.0134(10) 1.1158(8) 0.6117(12) 0.0570(11) Uani 0.35 1 d PD A 1 
F1B F 0.8130(6) 1.0826(4) 0.6113(6) 0.0556(11) Uani 0.70 1 d PD A 2 
F2B F 0.9546(6) 1.0370(4) 0.6405(6) 0.0495(10) Uani 0.70 1 d PD A 2 
F3B F 0.9235(6) 1.1509(4) 0.5965(7) 0.0570(11) Uani 0.65 1 d PD A 2 
F4 F 0.7105(4) 0.9657(2) -0.3589(4) 0.0556(11) Uani 1 1 d . . . 
F5 F 0.7272(4) 0.8734(2) -0.2793(4) 0.0495(10) Uani 1 1 d . . . 
F6 F 0.8625(4) 0.9235(3) -0.2992(4) 0.0570(11) Uani 1 1 d . . . 
C1 C 0.8226(6) 1.0210(3) 0.3949(6) 0.0282(15) Uani 1 1 d . . . 
H1 H 0.7953 0.9957 0.4487 0.034 Uiso 1 1 calc R . . 
C2 C 0.8824(6) 1.0740(4) 0.4393(6) 0.0348(16) Uani 1 1 d . A . 
C3 C 0.9194(6) 1.1129(3) 0.3622(6) 0.0305(16) Uani 1 1 d . . . 
H3 H 0.9587 1.1505 0.3919 0.037 Uiso 1 1 calc R . . 
C4 C 0.8979(5) 1.0959(3) 0.2407(6) 0.0253(14) Uani 1 1 d . . . 
H4 H 0.9223 1.1217 0.1852 0.030 Uiso 1 1 calc R . . 
C5 C 0.8406(5) 1.0409(3) 0.2012(6) 0.0220(13) Uani 1 1 d . . . 
C6 C 0.8202(5) 1.0164(3) 0.0755(6) 0.0232(14) Uani 1 1 d . . . 
C7 C 0.8601(6) 1.0462(4) -0.0111(6) 0.0347(17) Uani 1 1 d . . . 
H7 H 0.8977 1.0854 0.0067 0.042 Uiso 1 1 calc R . . 
C8 C 0.8438(6) 1.0174(4) -0.1247(6) 0.0344(17) Uani 1 1 d . . . 
H8 H 0.8719 1.0362 -0.1852 0.041 Uiso 1 1 calc R . . 
C9 C 0.7863(5) 0.9613(3) -0.1488(6) 0.0244(14) Uani 1 1 d . . . 
C10 C 0.7475(5) 0.9346(3) -0.0592(6) 0.0234(14) Uani 1 1 d . . . 
H10 H 0.7079 0.8961 -0.0762 0.028 Uiso 1 1 calc R . . 
C11 C 0.6475(6) 0.8052(3) 0.3440(6) 0.0271(15) Uani 1 1 d . . . 
H11A H 0.6793 0.7792 0.4176 0.033 Uiso 1 1 calc R . . 
H11B H 0.5695 0.8025 0.3271 0.033 Uiso 1 1 calc R . . 
C12 C 0.6810(6) 0.7786(3) 0.2363(6) 0.0296(15) Uani 1 1 d . . . 
H12A H 0.6462 0.7367 0.2126 0.036 Uiso 1 1 calc R . . 
H12B H 0.7586 0.7715 0.2607 0.036 Uiso 1 1 calc R . . 
C13 C 0.5018(5) 0.8332(3) 0.0715(6) 0.0278(15) Uani 1 1 d . . . 
H13A H 0.4726 0.8024 0.0047 0.033 Uiso 1 1 calc R . . 
H13B H 0.4816 0.8181 0.1445 0.033 Uiso 1 1 calc R . . 
C14 C 0.4514(6) 0.8977(3) 0.0347(6) 0.0301(16) Uani 1 1 d . . . 
H14A H 0.3738 0.8925 0.0177 0.036 Uiso 1 1 calc R . . 
H14B H 0.4663 0.9103 -0.0428 0.036 Uiso 1 1 calc R . . 
C15 C 0.4741(6) 0.9291(4) 0.2822(6) 0.0329(16) Uani 1 1 d . . . 
H15A H 0.4177 0.9533 0.3056 0.040 Uiso 1 1 calc R . . 
H15B H 0.4493 0.8844 0.2660 0.040 Uiso 1 1 calc R . . 
C16 C 0.5721(5) 0.9293(3) 0.3890(6) 0.0274(14) Uani 1 1 d . . . 
H16A H 0.5529 0.9101 0.4596 0.033 Uiso 1 1 calc R . . 
H16B H 0.5914 0.9744 0.4101 0.033 Uiso 1 1 calc R . . 
C17 C 0.9079(7) 1.0890(4) 0.5716(7) 0.054(3) Uani 1 1 d D . . 
C18 C 0.7712(5) 0.9299(3) -0.2708(6) 0.0252(14) Uani 1 1 d . . . 
P1 P 0.94161(19) 0.79125(10) 0.0215(2) 0.0436(5) Uani 1 1 d . . . 
F11 F 0.9112(5) 0.7227(3) -0.0377(6) 0.087(2) Uani 1 1 d . B . 
F12 F 0.9678(6) 0.8600(3) 0.0802(7) 0.095(2) Uani 1 1 d . B . 
F13A F 0.9687(18) 0.7541(8) 0.1469(13) 0.084(5) Uani 0.45 1 d P B 3 
F14A F 0.9426(16) 0.8361(8) -0.0894(14) 0.090(5) Uani 0.45 1 d P B 3 
F15A F 0.8323(14) 0.8058(10) 0.007(3) 0.095(9) Uani 0.35 1 d P B 3 
F16A F 1.0623(13) 0.7736(10) 0.023(2) 0.114(7) Uani 0.45 1 d P B 3 
F13B F 1.0319(10) 0.7651(6) 0.1217(14) 0.070(4) Uani 0.55 1 d P B 4 
F14B F 0.8330(11) 0.8139(5) -0.0823(12) 0.078(4) Uani 0.55 1 d P B 4 
F15B F 0.8607(10) 0.7846(8) 0.1023(13) 0.112(4) Uani 0.65 1 d P B 4 
F16B F 1.0101(16) 0.8012(7) -0.0642(16) 0.100(5) Uani 0.55 1 d P B 4 
P2 P 0.56979(16) 1.14147(10) 0.33632(19) 0.0359(5) Uani 1 1 d . . . 
F21 F 0.6076(7) 1.0881(3) 0.4343(8) 0.116(3) Uani 1 1 d . C . 
F22 F 0.5296(6) 1.1939(4) 0.2374(5) 0.116(3) Uani 1 1 d . C . 
F23A F 0.4677(11) 1.1113(8) 0.2389(14) 0.067(4) Uani 0.50 1 d P C 5 
F23B F 0.4873(13) 1.0831(8) 0.3055(19) 0.083(6) Uani 0.50 1 d P C 5 
F24 F 0.6642(4) 1.1837(3) 0.4024(5) 0.0736(18) Uani 1 1 d . C . 
F25 F 0.6412(4) 1.1117(3) 0.2567(5) 0.0563(14) Uani 1 1 d . C . 
F26 F 0.4972(4) 1.1716(2) 0.4146(4) 0.0457(11) Uani 1 1 d . C . 
N3 N 0.2756(8) 0.8341(5) 0.1699(11) 0.085(3) Uani 1 1 d . . . 
C19 C 0.2565(7) 0.7989(5) 0.2378(11) 0.061(3) Uani 1 1 d . . . 
C20 C 0.2322(8) 0.7516(5) 0.3237(10) 0.068(3) Uani 1 1 d . . . 
H20A H 0.2183 0.7098 0.2835 0.102 Uiso 1 1 calc R . . 
H20B H 0.1696 0.7656 0.3479 0.102 Uiso 1 1 calc R . . 
H20C H 0.2928 0.7482 0.3962 0.102 Uiso 1 1 calc R . . 
 
loop_ 
 _atom_site_aniso_label 
 _atom_site_aniso_U_11 
 _atom_site_aniso_U_22 
 _atom_site_aniso_U_33 
 _atom_site_aniso_U_23 
 _atom_site_aniso_U_13 
 _atom_site_aniso_U_12 
Pt 0.02434(13) 0.01774(12) 0.01758(12) 0.00023(11) 0.00789(9) -0.00226(11) 
S1 0.0318(9) 0.0225(8) 0.0188(8) 0.0029(6) 0.0089(7) -0.0031(7) 
S2 0.0308(9) 0.0186(8) 0.0247(8) -0.0038(6) 0.0100(7) -0.0031(7) 
S3 0.0345(10) 0.0263(9) 0.0275(9) 0.0018(7) 0.0084(7) 0.0053(7) 
N1 0.023(3) 0.021(3) 0.021(3) -0.002(2) 0.005(2) -0.001(2) 
N2 0.024(3) 0.028(3) 0.017(3) 0.003(2) 0.006(2) 0.001(2) 
F1A 0.085(3) 0.054(3) 0.0224(17) -0.0068(18) 0.0054(19) 0.021(2) 
F2A 0.067(3) 0.053(3) 0.0304(18) -0.0099(18) 0.0169(18) -0.015(2) 
F3A 0.061(3) 0.073(3) 0.043(2) -0.023(2) 0.025(2) -0.017(2) 
F1B 0.085(3) 0.054(3) 0.0224(17) -0.0068(18) 0.0054(19) 0.021(2) 
F2B 0.067(3) 0.053(3) 0.0304(18) -0.0099(18) 0.0169(18) -0.015(2) 
F3B 0.061(3) 0.073(3) 0.043(2) -0.023(2) 0.025(2) -0.017(2) 
F4 0.085(3) 0.054(3) 0.0224(17) -0.0068(18) 0.0054(19) 0.021(2) 
F5 0.067(3) 0.053(3) 0.0304(18) -0.0099(18) 0.0169(18) -0.015(2) 
F6 0.061(3) 0.073(3) 0.043(2) -0.023(2) 0.025(2) -0.017(2) 
C1 0.038(4) 0.027(4) 0.020(3) 0.003(3) 0.008(3) -0.008(3) 
C2 0.046(4) 0.030(4) 0.029(4) -0.007(3) 0.010(3) -0.008(4) 
C3 0.035(4) 0.027(4) 0.029(4) -0.008(3) 0.007(3) -0.008(3) 
C4 0.027(4) 0.024(3) 0.025(3) 0.002(3) 0.008(3) -0.005(3) 
C5 0.022(3) 0.024(3) 0.019(3) 0.002(3) 0.004(3) 0.002(3) 
C6 0.021(3) 0.022(3) 0.025(3) 0.004(3) 0.004(3) -0.004(3) 
C7 0.050(5) 0.031(4) 0.025(4) -0.003(3) 0.014(3) -0.018(3) 
C8 0.049(5) 0.035(4) 0.023(4) 0.001(3) 0.017(3) -0.010(3) 
C9 0.024(4) 0.028(4) 0.020(3) 0.002(3) 0.003(3) 0.005(3) 
C10 0.027(3) 0.023(4) 0.021(3) -0.001(3) 0.008(3) 0.002(3) 
C11 0.036(4) 0.023(4) 0.020(3) 0.006(3) 0.004(3) -0.001(3) 
C12 0.040(4) 0.017(3) 0.033(4) 0.004(3) 0.013(3) -0.001(3) 
C13 0.030(4) 0.028(4) 0.024(3) -0.003(3) 0.006(3) -0.006(3) 
C14 0.031(4) 0.035(4) 0.021(3) 0.002(3) 0.001(3) 0.002(3) 
C15 0.032(4) 0.038(4) 0.034(4) 0.002(3) 0.019(3) 0.002(3) 
C16 0.035(4) 0.032(4) 0.019(3) 0.002(3) 0.013(3) 0.004(3) 
C17 0.098(8) 0.034(5) 0.028(4) -0.005(3) 0.015(5) -0.030(5) 
C18 0.028(4) 0.029(4) 0.021(3) 0.001(3) 0.010(3) -0.006(3) 
P1 0.0529(14) 0.0360(12) 0.0472(12) 0.0101(9) 0.0226(11) 0.0130(10) 
F11 0.077(4) 0.061(4) 0.109(5) -0.026(4) 0.001(4) 0.009(3) 
F12 0.122(6) 0.050(4) 0.126(6) -0.026(4) 0.057(5) -0.015(4) 
F13A 0.144(18) 0.065(10) 0.046(8) 0.019(7) 0.029(11) 0.024(12) 
F14A 0.122(15) 0.086(12) 0.075(10) 0.048(9) 0.049(10) 0.021(11) 
F15A 0.031(10) 0.102(16) 0.16(2) 0.081(18) 0.037(14) 0.023(9) 
F16A 0.070(11) 0.136(17) 0.148(18) 0.033(14) 0.051(12) 0.061(11) 
F13B 0.045(7) 0.058(7) 0.092(11) 0.015(7) -0.008(6) 0.004(6) 
F14B 0.098(10) 0.035(6) 0.069(7) -0.003(5) -0.034(7) 0.022(6) 
F15B 0.095(9) 0.151(13) 0.120(11) -0.002(9) 0.078(9) 0.002(9) 
F16B 0.140(15) 0.073(10) 0.132(13) 0.020(9) 0.114(12) 0.001(9) 
P2 0.0356(11) 0.0308(11) 0.0422(11) -0.0096(8) 0.0119(9) -0.0026(8) 
F21 0.160(7) 0.071(5) 0.164(7) 0.073(5) 0.123(7) 0.064(5) 
F22 0.136(6) 0.177(8) 0.048(4) 0.049(4) 0.046(4) 0.117(6) 
F23A 0.031(6) 0.078(12) 0.086(11) -0.042(8) 0.006(7) -0.009(7) 
F23B 0.056(10) 0.062(11) 0.145(18) -0.045(10) 0.050(12) -0.024(8) 
F24 0.065(4) 0.083(4) 0.077(4) -0.041(3) 0.026(3) -0.033(3) 
F25 0.040(3) 0.073(4) 0.055(3) -0.024(3) 0.012(2) 0.009(2) 
F26 0.062(3) 0.033(3) 0.049(3) 0.002(2) 0.027(2) 0.010(2) 
N3 0.062(6) 0.071(7) 0.132(10) -0.008(6) 0.041(6) -0.016(5) 
C19 0.038(5) 0.054(6) 0.092(8) -0.032(6) 0.022(5) -0.014(5) 
C20 0.069(7) 0.062(7) 0.071(7) -0.031(6) 0.015(6) 0.003(5) 
 
_geom_special_details 
; 
All esds (except the esd in the dihedral angle 
between two l.s. planes) are estimated using the 
full covariance matrix. The cell esds are taken 
into account individually in the estimation of 
esds in distances, angles and torsion angles; 
correlations between esds in cell parameters are 
only used when they are defined by crystal symmetry.  
An approximate (isotropic) treatment of cell esds is 
used for estimating esds involving l.s. planes. 
; 
 
loop_ 
 _geom_bond_atom_site_label_1 
 _geom_bond_atom_site_label_2 
 _geom_bond_distance 
 _geom_bond_site_symmetry_2 
 _geom_bond_publ_flag 
Pt N2 2.053(5) . ? 
Pt N1 2.058(5) . ? 
Pt S1 2.2636(15) . ? 
Pt S2 2.2758(16) . ? 
S1 C16 1.818(7) . ? 
S1 C11 1.830(7) . ? 
S2 C12 1.826(7) . ? 
S2 C13 1.830(7) . ? 
S3 C14 1.809(7) . ? 
S3 C15 1.821(7) . ? 
N1 C1 1.344(8) . ? 
N1 C5 1.351(8) . ? 
N2 C10 1.341(8) . ? 
N2 C6 1.355(8) . ? 
F1A C17 1.224(14) . ? 
F2A C17 1.243(15) . ? 
F3A C17 1.447(13) . ? 
F1B C17 1.443(11) . ? 
F2B C17 1.381(10) . ? 
F3B C17 1.329(10) . ? 
F4 C18 1.329(8) . ? 
F5 C18 1.307(8) . ? 
F6 C18 1.330(8) . ? 
C1 C2 1.372(10) . ? 
C1 H1 0.9500 . ? 
C2 C3 1.378(10) . ? 
C2 C17 1.484(10) . ? 
C3 C4 1.380(9) . ? 
C3 H3 0.9500 . ? 
C4 C5 1.381(9) . ? 
C4 H4 0.9500 . ? 
C5 C6 1.474(9) . ? 
C6 C7 1.383(9) . ? 
C7 C8 1.388(10) . ? 
C7 H7 0.9500 . ? 
C8 C9 1.381(10) . ? 
C8 H8 0.9500 . ? 
C9 C10 1.376(9) . ? 
C9 C18 1.499(9) . ? 
C10 H10 0.9500 . ? 
C11 C12 1.517(9) . ? 
C11 H11A 0.9900 . ? 
C11 H11B 0.9900 . ? 
C12 H12A 0.9900 . ? 
C12 H12B 0.9900 . ? 
C13 C14 1.509(10) . ? 
C13 H13A 0.9900 . ? 
C13 H13B 0.9900 . ? 
C14 H14A 0.9900 . ? 
C14 H14B 0.9900 . ? 
C15 C16 1.510(10) . ? 
C15 H15A 0.9900 . ? 
C15 H15B 0.9900 . ? 
C16 H16A 0.9900 . ? 
C16 H16B 0.9900 . ? 
P1 F15A 1.430(16) . ? 
P1 F13B 1.505(11) . ? 
P1 F16B 1.510(10) . ? 
P1 F14A 1.575(13) . ? 
P1 F13A 1.578(14) . ? 
P1 F12 1.582(6) . ? 
P1 F11 1.587(6) . ? 
P1 F15B 1.589(10) . ? 
P1 F16A 1.623(15) . ? 
P1 F14B 1.654(10) . ? 
P2 F24 1.541(5) . ? 
P2 F22 1.557(6) . ? 
P2 F21 1.560(6) . ? 
P2 F25 1.596(5) . ? 
P2 F26 1.599(5) . ? 
P2 F23B 1.604(15) . ? 
P2 F23A 1.616(14) . ? 
N3 C19 1.143(14) . ? 
C19 C20 1.485(16) . ? 
C20 H20A 0.9800 . ? 
C20 H20B 0.9800 . ? 
C20 H20C 0.9800 . ? 
 
loop_ 
 _geom_angle_atom_site_label_1 
 _geom_angle_atom_site_label_2 
 _geom_angle_atom_site_label_3 
 _geom_angle 
 _geom_angle_site_symmetry_1 
 _geom_angle_site_symmetry_3 
 _geom_angle_publ_flag 
N2 Pt N1 79.6(2) . . ? 
N2 Pt S1 171.44(15) . . ? 
N1 Pt S1 94.38(15) . . ? 
N2 Pt S2 96.82(16) . . ? 
N1 Pt S2 171.19(15) . . ? 
S1 Pt S2 88.23(6) . . ? 
C16 S1 C11 103.9(3) . . ? 
C16 S1 Pt 105.8(2) . . ? 
C11 S1 Pt 106.4(2) . . ? 
C12 S2 C13 100.9(3) . . ? 
C12 S2 Pt 100.2(2) . . ? 
C13 S2 Pt 110.9(2) . . ? 
C14 S3 C15 102.3(3) . . ? 
C1 N1 C5 118.7(5) . . ? 
C1 N1 Pt 126.3(4) . . ? 
C5 N1 Pt 115.0(4) . . ? 
C10 N2 C6 118.7(5) . . ? 
C10 N2 Pt 126.7(4) . . ? 
C6 N2 Pt 114.6(4) . . ? 
C17 F2A F3A 71.1(11) . . ? 
F2A F3A C17 54.4(8) . . ? 
N1 C1 C2 121.3(6) . . ? 
N1 C1 H1 119.4 . . ? 
C2 C1 H1 119.4 . . ? 
C1 C2 C3 120.5(6) . . ? 
C1 C2 C17 119.5(6) . . ? 
C3 C2 C17 120.0(7) . . ? 
C2 C3 C4 118.3(6) . . ? 
C2 C3 H3 120.8 . . ? 
C4 C3 H3 120.8 . . ? 
C3 C4 C5 119.1(6) . . ? 
C3 C4 H4 120.5 . . ? 
C5 C4 H4 120.5 . . ? 
N1 C5 C4 122.1(6) . . ? 
N1 C5 C6 114.8(6) . . ? 
C4 C5 C6 123.1(6) . . ? 
N2 C6 C7 122.1(6) . . ? 
N2 C6 C5 115.8(5) . . ? 
C7 C6 C5 122.1(6) . . ? 
C6 C7 C8 118.5(7) . . ? 
C6 C7 H7 120.8 . . ? 
C8 C7 H7 120.8 . . ? 
C9 C8 C7 119.4(6) . . ? 
C9 C8 H8 120.3 . . ? 
C7 C8 H8 120.3 . . ? 
C10 C9 C8 119.2(6) . . ? 
C10 C9 C18 121.8(6) . . ? 
C8 C9 C18 119.0(6) . . ? 
N2 C10 C9 122.1(6) . . ? 
N2 C10 H10 118.9 . . ? 
C9 C10 H10 118.9 . . ? 
C12 C11 S1 110.5(5) . . ? 
C12 C11 H11A 109.6 . . ? 
S1 C11 H11A 109.6 . . ? 
C12 C11 H11B 109.6 . . ? 
S1 C11 H11B 109.6 . . ? 
H11A C11 H11B 108.1 . . ? 
C11 C12 S2 111.8(5) . . ? 
C11 C12 H12A 109.3 . . ? 
S2 C12 H12A 109.3 . . ? 
C11 C12 H12B 109.3 . . ? 
S2 C12 H12B 109.3 . . ? 
H12A C12 H12B 107.9 . . ? 
C14 C13 S2 114.5(5) . . ? 
C14 C13 H13A 108.6 . . ? 
S2 C13 H13A 108.6 . . ? 
C14 C13 H13B 108.6 . . ? 
S2 C13 H13B 108.6 . . ? 
H13A C13 H13B 107.6 . . ? 
C13 C14 S3 117.7(5) . . ? 
C13 C14 H14A 107.9 . . ? 
S3 C14 H14A 107.9 . . ? 
C13 C14 H14B 107.9 . . ? 
S3 C14 H14B 107.9 . . ? 
H14A C14 H14B 107.2 . . ? 
C16 C15 S3 115.2(5) . . ? 
C16 C15 H15A 108.5 . . ? 
S3 C15 H15A 108.5 . . ? 
C16 C15 H15B 108.5 . . ? 
S3 C15 H15B 108.5 . . ? 
H15A C15 H15B 107.5 . . ? 
C15 C16 S1 118.4(5) . . ? 
C15 C16 H16A 107.7 . . ? 
S1 C16 H16A 107.7 . . ? 
C15 C16 H16B 107.7 . . ? 
S1 C16 H16B 107.7 . . ? 
H16A C16 H16B 107.1 . . ? 
F1A C17 F2A 114.2(12) . . ? 
F3B C17 F2B 128.7(8) . . ? 
F3B C17 F1B 96.8(7) . . ? 
F2B C17 F1B 92.0(6) . . ? 
F1A C17 F3A 105.9(12) . . ? 
F2A C17 F3A 54.5(10) . . ? 
F1A C17 C2 127.0(11) . . ? 
F2A C17 C2 118.2(11) . . ? 
F3B C17 C2 113.7(7) . . ? 
F2B C17 C2 110.7(7) . . ? 
F1B C17 C2 108.8(7) . . ? 
F3A C17 C2 109.5(8) . . ? 
F5 C18 F4 107.0(6) . . ? 
F5 C18 F6 107.5(6) . . ? 
F4 C18 F6 105.5(5) . . ? 
F5 C18 C9 114.1(5) . . ? 
F4 C18 C9 110.6(6) . . ? 
F6 C18 C9 111.6(5) . . ? 
F13B P1 F16B 93.2(10) . . ? 
F15A P1 F14A 90.4(11) . . ? 
F15A P1 F13A 100.4(13) . . ? 
F14A P1 F13A 165.6(11) . . ? 
F15A P1 F12 87.2(12) . . ? 
F13B P1 F12 88.5(6) . . ? 
F16B P1 F12 92.8(6) . . ? 
F14A P1 F12 75.5(7) . . ? 
F13A P1 F12 95.5(7) . . ? 
F15A P1 F11 90.9(11) . . ? 
F13B P1 F11 92.8(6) . . ? 
F16B P1 F11 88.5(6) . . ? 
F14A P1 F11 104.6(7) . . ? 
F13A P1 F11 84.8(7) . . ? 
F12 P1 F11 178.1(4) . . ? 
F13B P1 F15B 92.4(9) . . ? 
F16B P1 F15B 174.4(10) . . ? 
F12 P1 F15B 86.5(6) . . ? 
F11 P1 F15B 92.1(6) . . ? 
F15A P1 F16A 174.0(16) . . ? 
F14A P1 F16A 85.5(10) . . ? 
F13A P1 F16A 84.3(11) . . ? 
F12 P1 F16A 95.9(8) . . ? 
F11 P1 F16A 86.0(8) . . ? 
F13B P1 F14B 172.9(8) . . ? 
F16B P1 F14B 92.8(10) . . ? 
F12 P1 F14B 95.0(5) . . ? 
F11 P1 F14B 83.5(4) . . ? 
F15B P1 F14B 81.8(8) . . ? 
F24 P2 F22 91.1(5) . . ? 
F24 P2 F21 90.2(5) . . ? 
F22 P2 F21 178.7(5) . . ? 
F24 P2 F25 89.0(3) . . ? 
F22 P2 F25 89.9(3) . . ? 
F21 P2 F25 90.3(3) . . ? 
F24 P2 F26 91.4(3) . . ? 
F22 P2 F26 89.5(3) . . ? 
F21 P2 F26 90.3(3) . . ? 
F25 P2 F26 179.3(3) . . ? 
F24 P2 F23B 161.3(8) . . ? 
F22 P2 F23B 107.5(8) . . ? 
F21 P2 F23B 71.2(8) . . ? 
F25 P2 F23B 92.6(6) . . ? 
F26 P2 F23B 87.3(6) . . ? 
F24 P2 F23A 164.7(7) . . ? 
F22 P2 F23A 74.0(7) . . ? 
F21 P2 F23A 104.8(7) . . ? 
F25 P2 F23A 87.9(6) . . ? 
F26 P2 F23A 91.6(6) . . ? 
N3 C19 C20 178.2(11) . . ? 
C19 C20 H20A 109.5 . . ? 
C19 C20 H20B 109.5 . . ? 
H20A C20 H20B 109.5 . . ? 
C19 C20 H20C 109.5 . . ? 
H20A C20 H20C 109.5 . . ? 
H20B C20 H20C 109.5 . . ? 
 
 
_diffrn_measured_fraction_theta_max    1.000 
_diffrn_reflns_theta_full              26.37 
_diffrn_measured_fraction_theta_full   1.000 
_refine_diff_density_max    1.866 
_refine_diff_density_min   -1.453 
_refine_diff_density_rms    0.157 


# eof data_5 ================================================ 

  
 
data_6 
 
_audit_creation_method            SHELXL-97 
_chemical_name_systematic 
; 
4,4'-di-tert-butylbipyridine-(1,4,7-trithiacyclononane)platinum(II) 
bis(hexafluorophosphate) acetonitrile benzene solvate
; 
_chemical_name_common             ? 
_chemical_melting_point           ? 
_chemical_formula_moiety          ? 
_chemical_formula_sum             'C31 H45 F12 N4 P2 Pt S3' 
_chemical_formula_weight          1054.92 
 
loop_ 
 _atom_type_symbol 
 _atom_type_description 
 _atom_type_scat_dispersion_real 
 _atom_type_scat_dispersion_imag 
 _atom_type_scat_source 
 'C'  'C'   0.0033   0.0016 
 'International Tables Vol C Tables 4.2.6.8 and 6.1.1.4' 
 'H'  'H'   0.0000   0.0000 
 'International Tables Vol C Tables 4.2.6.8 and 6.1.1.4' 
 'N'  'N'   0.0061   0.0033 
 'International Tables Vol C Tables 4.2.6.8 and 6.1.1.4' 
 'F'  'F'   0.0171   0.0103 
 'International Tables Vol C Tables 4.2.6.8 and 6.1.1.4' 
 'P'  'P'   0.1023   0.0942 
 'International Tables Vol C Tables 4.2.6.8 and 6.1.1.4' 
 'S'  'S'   0.1246   0.1234 
 'International Tables Vol C Tables 4.2.6.8 and 6.1.1.4' 
 'Pt'  'Pt'  -1.7033   8.3905 
 'International Tables Vol C Tables 4.2.6.8 and 6.1.1.4' 
 
_symmetry_cell_setting            Monoclinic 
_symmetry_space_group_name_H-M    P2(1)/c 
_symmetry_space_group_name_Hall   '-P 2ybc'

 
loop_ 
 _symmetry_equiv_pos_as_xyz 
 'x, y, z' 
 '-x, y+1/2, -z+1/2' 
 '-x, -y, -z' 
 'x, -y-1/2, z-1/2' 
 
_cell_length_a                    13.0533(13) 
_cell_length_b                    13.1714(14) 
_cell_length_c                    23.742(2) 
_cell_angle_alpha                 90.00 
_cell_angle_beta                  104.818(2) 
_cell_angle_gamma                 90.00 
_cell_volume                      3946.2(7) 
_cell_formula_units_Z             4 
_cell_measurement_temperature     150(2) 
_cell_measurement_reflns_used     2870 
_cell_measurement_theta_min       2.55 
_cell_measurement_theta_max       20.83 
 
_exptl_crystal_description        block 
_exptl_crystal_colour             orange 
_exptl_crystal_size_max           0.14 
_exptl_crystal_size_mid           0.12 
_exptl_crystal_size_min           0.10 
_exptl_crystal_density_meas       'not measured'  
_exptl_crystal_density_diffrn     1.776 
_exptl_crystal_density_method     ?
_exptl_crystal_F_000              2092 
_exptl_absorpt_coefficient_mu     3.882 
_exptl_absorpt_correction_type    multi-scan 
_exptl_absorpt_correction_T_min   0.6125 
_exptl_absorpt_correction_T_max   0.6975 
_exptl_absorpt_process_details    'SADABS (Sheldrick)' 
  
_exptl_special_details 
; 
A suitable crystal was mounted on a glass fiber with paratone-N 
and immediately transferred to the goniostat bathed in a cold 
stream. 

The first 50 frames of data were recollected for a decay
correction. The decay correction was applied simultaneously
with the absorption correction in SADABS. No formal measure 
of the extent of decay is printed out by this program. 

The final unit cell is obtained from the refinement of
the XYZ weighted centroids of reflections above 20 \s(I).

Note that the absorption correction parameters Tmin and Tmax also 
reflect beam corrections, etc. As a result, the numerical values 
for Tmin and Tmax may differ from expected values based solely 
absorption effects and crystal size. 
; 
  
 
_diffrn_ambient_temperature       150(2) 
_diffrn_radiation_wavelength      0.71073 
_diffrn_radiation_type            MoK\a 
_diffrn_radiation_source          'sealed tube' 
_diffrn_radiation_monochromator   graphite 
_diffrn_measurement_device_type   'SMART 1K CCD' 
_diffrn_measurement_method        '\w scans' 
_diffrn_detector_area_resol_mean  0.75
_diffrn_standards_number          0 
_diffrn_standards_interval_count  ? 
_diffrn_standards_interval_time   ? 
_diffrn_standards_decay_%         ? 
_diffrn_reflns_number             25854 
_diffrn_reflns_av_R_equivalents   0.1184 
_diffrn_reflns_av_sigmaI/netI     0.1807 
_diffrn_reflns_limit_h_min        -17 
_diffrn_reflns_limit_h_max        14 
_diffrn_reflns_limit_k_min        -16 
_diffrn_reflns_limit_k_max        17 
_diffrn_reflns_limit_l_min        -28 
_diffrn_reflns_limit_l_max        31 
_diffrn_reflns_theta_min          2.55 
_diffrn_reflns_theta_max          28.30 
_reflns_number_total              9753 
_reflns_number_gt                 5105 
_reflns_threshold_expression      >2\s(I) 
  
_computing_data_collection        'Bruker SMART v5.054' 
_computing_cell_refinement        'Bruker SAINT v5.A06'
_computing_data_reduction         'Bruker SAINT v5.A06' 
_computing_structure_solution     'Bruker SHELXTL v5.1, v6.12' 
_computing_structure_refinement   'Bruker SHELXTL v5.1, v6.12' 
_computing_molecular_graphics     
'Bruker SHELXTL v5.1, v6.12 and Crystal Impact DIAMOND v2.1e (1997)'
_computing_publication_material   'Bruker SHELXTL v5.1, v6.12' 
  
_refine_special_details 
; 
Refinement of F^2^ against ALL reflections.  The weighted 
R-factor wR and goodness of fit S are based on F^2^, 
conventional R-factors R are based on F, with F set to zero 
for negative F^2^. The threshold expression of F^2^ > 2\s(F^2^) 
is used only for calculating R-factors(gt) etc. and is 
not relevant to the choice of reflections for refinement.  
R-factors based on F^2^ are statistically about twice as large 
as those based on F, and R-factors based on ALL data will be 
even larger. 

The H-atoms on the cation were either located directly
from the difference map or calculated based on geometric
criteria and were treated with a riding model in 
subsequent refinements. The Uiso for these atoms were
defined as a*Ueq of the adjacent atom (a=1.5 for methyl 
and 1.2 for all others). 

One PF~6~ anion shows typical disorder, a reasonable disorder
model is presented with occupancies set at 0.5. Additionally, 
the nitrogen atom, N4, of an acetonitrile shows disorder however 
a second component was not investigated. The largest residual
electron density peaks are in the area of the disordered PF~6~.

Two molecules of acetonitrile and half molecule of benzene are
incorporated in the lattice.
; 
  _refine_ls_structure_factor_coef  Fsqd  
_refine_ls_matrix_type            full 
_refine_ls_weighting_scheme       calc  
_refine_ls_weighting_details 
 'calc w=1/[\s^2^(Fo^2^)+(0.0591P)^2^+0.0000P] where P=(Fo^2^+2Fc^2^)/3' 
_atom_sites_solution_primary      direct 
_atom_sites_solution_secondary    difmap 
_atom_sites_solution_hydrogens    geom 
_refine_ls_hydrogen_treatment     mixed 
_refine_ls_extinction_method      none 
_refine_ls_extinction_coef        ? 
_refine_ls_number_reflns          9753 
_refine_ls_number_parameters      516 
_refine_ls_number_restraints      0 
_refine_ls_R_factor_all           0.1524 
_refine_ls_R_factor_gt            0.0569 
_refine_ls_wR_factor_ref          0.1493 
_refine_ls_wR_factor_gt           0.1135 
_refine_ls_goodness_of_fit_ref    0.964 
_refine_ls_restrained_S_all       0.964 
_refine_ls_shift/su_max           0.001 
_refine_ls_shift/su_mean          0.000 
 
loop_ 
 _atom_site_label 
 _atom_site_type_symbol 
 _atom_site_fract_x 
 _atom_site_fract_y 
 _atom_site_fract_z 
 _atom_site_U_iso_or_equiv 
 _atom_site_adp_type 
 _atom_site_occupancy 
 _atom_site_symmetry_multiplicity 
 _atom_site_calc_flag 
 _atom_site_refinement_flags 
 _atom_site_disorder_assembly 
 _atom_site_disorder_group 
Pt Pt -0.11079(3) 0.64387(3) 0.598827(15) 0.01707(11) Uani 1 1 d . . . 
S1 S -0.23879(19) 0.75032(17) 0.54874(10) 0.0222(5) Uani 1 1 d . . . 
S2 S -0.22986(19) 0.51423(18) 0.57606(10) 0.0236(5) Uani 1 1 d . . . 
S3 S -0.0790(2) 0.59826(19) 0.48257(10) 0.0263(6) Uani 1 1 d . . . 
N1 N -0.0010(6) 0.7551(5) 0.6332(3) 0.0198(17) Uani 1 1 d . . . 
N2 N 0.0080(6) 0.5583(5) 0.6497(3) 0.0173(16) Uani 1 1 d . . . 
C1 C -0.0127(6) 0.8559(7) 0.6260(4) 0.0184(18) Uani 1 1 d . . . 
H1 H -0.0768 0.8817 0.6017 0.022 Uiso 1 1 calc R . . 
C2 C 0.0650(8) 0.9225(6) 0.6528(4) 0.025(2) Uani 1 1 d . . . 
H2 H 0.0530 0.9932 0.6468 0.030 Uiso 1 1 calc R . . 
C3 C 0.1599(7) 0.8902(6) 0.6880(4) 0.017(2) Uani 1 1 d . . . 
C4 C 0.1725(7) 0.7841(6) 0.6943(4) 0.017(2) Uani 1 1 d . . . 
H4 H 0.2369 0.7570 0.7176 0.021 Uiso 1 1 calc R . . 
C5 C 0.0922(7) 0.7196(6) 0.6671(4) 0.0163(19) Uani 1 1 d . . . 
C6 C 0.0979(7) 0.6090(6) 0.6748(4) 0.017(2) Uani 1 1 d . . . 
C7 C 0.1875(7) 0.5578(7) 0.7070(4) 0.021(2) Uani 1 1 d . . . 
H7 H 0.2510 0.5945 0.7229 0.025 Uiso 1 1 calc R . . 
C8 C 0.1845(7) 0.4506(6) 0.7160(3) 0.018(2) Uani 1 1 d . . . 
C9 C 0.0910(8) 0.4038(7) 0.6898(4) 0.027(2) Uani 1 1 d . . . 
H9 H 0.0848 0.3325 0.6940 0.032 Uiso 1 1 calc R . . 
C10 C 0.0057(7) 0.4576(7) 0.6577(4) 0.022(2) Uani 1 1 d . . . 
H10 H -0.0578 0.4219 0.6404 0.026 Uiso 1 1 calc R . . 
C11 C -0.3580(8) 0.6837(7) 0.5540(4) 0.026(2) Uani 1 1 d . . . 
H11A H -0.3660 0.6905 0.5942 0.031 Uiso 1 1 calc R . . 
H11B H -0.4203 0.7162 0.5274 0.031 Uiso 1 1 calc R . . 
C12 C -0.3569(8) 0.5734(7) 0.5391(4) 0.032(2) Uani 1 1 d . . . 
H12A H -0.3689 0.5657 0.4964 0.039 Uiso 1 1 calc R . . 
H12B H -0.4152 0.5383 0.5509 0.039 Uiso 1 1 calc R . . 
C13 C -0.1973(8) 0.4419(7) 0.5170(4) 0.028(2) Uani 1 1 d . . . 
H13A H -0.1318 0.4028 0.5338 0.034 Uiso 1 1 calc R . . 
H13B H -0.2548 0.3920 0.5026 0.034 Uiso 1 1 calc R . . 
C14 C -0.1810(8) 0.5005(6) 0.4648(4) 0.023(2) Uani 1 1 d . . . 
H14A H -0.2489 0.5328 0.4445 0.028 Uiso 1 1 calc R . . 
H14B H -0.1621 0.4519 0.4373 0.028 Uiso 1 1 calc R . . 
C15 C -0.1481(8) 0.7137(7) 0.4531(4) 0.033(3) Uani 1 1 d . . . 
H15A H -0.0991 0.7716 0.4656 0.040 Uiso 1 1 calc R . . 
H15B H -0.1642 0.7100 0.4101 0.040 Uiso 1 1 calc R . . 
C16 C -0.2501(8) 0.7369(7) 0.4697(4) 0.026(2) Uani 1 1 d . . . 
H16A H -0.3015 0.6820 0.4543 0.031 Uiso 1 1 calc R . . 
H16B H -0.2798 0.8007 0.4502 0.031 Uiso 1 1 calc R . . 
C17 C 0.2466(7) 0.9641(7) 0.7184(4) 0.023(2) Uani 1 1 d . . . 
C21 C 0.2842(10) 1.0199(9) 0.6718(5) 0.053(4) Uani 1 1 d . . . 
H18A H 0.3517 1.0537 0.6894 0.080 Uiso 1 1 calc R . . 
H18B H 0.2314 1.0707 0.6535 0.080 Uiso 1 1 calc R . . 
H18C H 0.2941 0.9714 0.6423 0.080 Uiso 1 1 calc R . . 
C19 C 0.2005(8) 1.0387(8) 0.7551(4) 0.039(3) Uani 1 1 d . . . 
H19A H 0.1847 1.0026 0.7879 0.059 Uiso 1 1 calc R . . 
H19B H 0.1352 1.0686 0.7309 0.059 Uiso 1 1 calc R . . 
H19C H 0.2520 1.0927 0.7698 0.059 Uiso 1 1 calc R . . 
C20 C 0.3415(9) 0.9102(8) 0.7585(5) 0.053(4) Uani 1 1 d . . . 
H20A H 0.3665 0.8565 0.7368 0.080 Uiso 1 1 calc R . . 
H20B H 0.3201 0.8802 0.7915 0.080 Uiso 1 1 calc R . . 
H20C H 0.3986 0.9592 0.7729 0.080 Uiso 1 1 calc R . . 
C18 C 0.2794(8) 0.3932(7) 0.7525(4) 0.027(2) Uani 1 1 d . . . 
C22 C 0.3175(9) 0.3143(8) 0.7132(4) 0.043(3) Uani 1 1 d . . . 
H22A H 0.3608 0.3486 0.6909 0.065 Uiso 1 1 calc R . . 
H22B H 0.2558 0.2830 0.6864 0.065 Uiso 1 1 calc R . . 
H22C H 0.3598 0.2616 0.7378 0.065 Uiso 1 1 calc R . . 
C23 C 0.2437(8) 0.3378(7) 0.8005(4) 0.027(2) Uani 1 1 d . . . 
H23A H 0.3039 0.3010 0.8252 0.040 Uiso 1 1 calc R . . 
H23B H 0.1873 0.2897 0.7830 0.040 Uiso 1 1 calc R . . 
H23C H 0.2170 0.3872 0.8242 0.040 Uiso 1 1 calc R . . 
C24 C 0.3723(8) 0.4604(7) 0.7810(4) 0.032(2) Uani 1 1 d . . . 
H24A H 0.3470 0.5189 0.7991 0.048 Uiso 1 1 calc R . . 
H24B H 0.4072 0.4842 0.7514 0.048 Uiso 1 1 calc R . . 
H24C H 0.4230 0.4217 0.8108 0.048 Uiso 1 1 calc R . . 
P1 P 0.4219(2) 0.6567(2) 0.63788(11) 0.0257(6) Uani 1 1 d . . . 
F11 F 0.4529(5) 0.7721(4) 0.6314(3) 0.0516(18) Uani 1 1 d . . . 
F12 F 0.4189(5) 0.6773(4) 0.7042(2) 0.0386(15) Uani 1 1 d . . . 
F13 F 0.2988(4) 0.6850(4) 0.6155(2) 0.0381(15) Uani 1 1 d . . . 
F14 F 0.5441(5) 0.6273(5) 0.6595(3) 0.0462(17) Uani 1 1 d . . . 
F15 F 0.3899(5) 0.5407(4) 0.6446(2) 0.0416(16) Uani 1 1 d . . . 
F16 F 0.4243(4) 0.6341(5) 0.5720(2) 0.0402(15) Uani 1 1 d . . . 
P2 P -0.1316(3) 1.1793(2) 0.64502(14) 0.0393(8) Uani 1 1 d . . . 
F21 F -0.1384(6) 1.0809(5) 0.6089(3) 0.071(2) Uani 1 1 d . A . 
F22 F -0.2248(6) 1.1465(5) 0.6710(3) 0.067(2) Uani 1 1 d . A . 
F23A F -0.0926(19) 1.2619(18) 0.6956(9) 0.088(8) Uani 0.50 1 d P A 1 
F24A F -0.2373(12) 1.2128(14) 0.5876(8) 0.045(5) Uani 0.50 1 d P A 1 
F25A F -0.0119(14) 1.1849(13) 0.6329(8) 0.063(5) Uani 0.50 1 d P A 1 
F26A F -0.0657(15) 1.0989(17) 0.7008(8) 0.070(7) Uani 0.50 1 d P A 1 
F23B F -0.1497(14) 1.2887(14) 0.6727(7) 0.040(4) Uani 0.50 1 d P A 2 
F24B F -0.177(2) 1.2458(13) 0.5989(8) 0.077(7) Uani 0.50 1 d P A 2 
F25B F -0.0585(11) 1.2380(12) 0.6090(7) 0.041(4) Uani 0.50 1 d P A 2 
F26B F -0.0400(15) 1.1572(13) 0.6916(8) 0.056(5) Uani 0.50 1 d P A 2 
N3 N -0.1319(10) 0.9522(8) 0.4878(4) 0.062(3) Uani 1 1 d . . . 
C25 C -0.1400(10) 1.0375(10) 0.4818(5) 0.051(3) Uani 1 1 d . . . 
C26 C -0.1497(11) 1.1505(8) 0.4730(5) 0.056(3) Uani 1 1 d . . . 
H26A H -0.0814 1.1783 0.4704 0.084 Uiso 1 1 calc R . . 
H26B H -0.1702 1.1816 0.5060 0.084 Uiso 1 1 calc R . . 
H26C H -0.2037 1.1652 0.4369 0.084 Uiso 1 1 calc R . . 
N4 N -0.5220(11) 0.6401(9) 0.4210(5) 0.097(5) Uani 1 1 d . . . 
C28 C -0.5267(10) 0.7985(9) 0.3601(5) 0.056(3) Uani 1 1 d . . . 
H28A H -0.5874 0.8435 0.3579 0.084 Uiso 1 1 calc R . . 
H28B H -0.5262 0.7761 0.3208 0.084 Uiso 1 1 calc R . . 
H28C H -0.4609 0.8352 0.3775 0.084 Uiso 1 1 calc R . . 
C27 C -0.5349(11) 0.7104(11) 0.3959(5) 0.060(4) Uani 1 1 d . . . 
C29 C -0.6031(13) 0.9853(11) 0.4682(7) 0.087(5) Uani 1 1 d . . . 
H29 H -0.6749 0.9792 0.4466 0.105 Uiso 1 1 calc R . . 
C30 C -0.5401(12) 1.0581(10) 0.4519(6) 0.068(4) Uani 1 1 d . . . 
H30 H -0.5674 1.0962 0.4173 0.082 Uiso 1 1 calc R . . 
C31 C -0.4345(13) 1.0774(14) 0.4861(7) 0.096(6) Uani 1 1 d . . . 
H31 H -0.3931 1.1314 0.4772 0.115 Uiso 1 1 calc R . . 
 
loop_ 
 _atom_site_aniso_label 
 _atom_site_aniso_U_11 
 _atom_site_aniso_U_22 
 _atom_site_aniso_U_33 
 _atom_site_aniso_U_23 
 _atom_site_aniso_U_13 
 _atom_site_aniso_U_12 
Pt 0.01925(18) 0.01246(17) 0.01766(17) -0.00087(17) 0.00137(12) -0.00152(18) 
S1 0.0204(13) 0.0190(12) 0.0244(12) -0.0016(10) 0.0007(10) 0.0032(10) 
S2 0.0233(14) 0.0195(13) 0.0255(12) -0.0002(10) 0.0018(10) -0.0057(10) 
S3 0.0301(15) 0.0227(13) 0.0273(13) -0.0026(10) 0.0094(11) -0.0014(11) 
N1 0.021(4) 0.013(4) 0.026(4) -0.003(3) 0.007(3) -0.006(3) 
N2 0.019(4) 0.010(4) 0.020(4) 0.000(3) 0.001(3) 0.001(3) 
C1 0.012(4) 0.015(4) 0.025(4) 0.001(4) 0.000(3) 0.003(4) 
C2 0.031(6) 0.002(4) 0.040(6) -0.001(4) 0.005(5) -0.003(4) 
C3 0.017(5) 0.013(4) 0.021(5) 0.001(4) 0.002(4) 0.002(4) 
C4 0.014(5) 0.013(5) 0.027(5) 0.002(4) 0.008(4) 0.002(4) 
C5 0.016(5) 0.016(5) 0.018(4) 0.001(4) 0.006(4) 0.005(4) 
C6 0.022(5) 0.013(4) 0.020(5) -0.002(4) 0.009(4) -0.001(4) 
C7 0.010(5) 0.017(5) 0.029(5) -0.002(4) -0.006(4) -0.003(4) 
C8 0.033(6) 0.005(4) 0.015(4) 0.001(3) 0.006(4) -0.004(4) 
C9 0.036(6) 0.012(5) 0.028(5) 0.000(4) 0.001(5) -0.007(4) 
C10 0.022(5) 0.012(5) 0.029(5) 0.007(4) 0.004(4) 0.001(4) 
C11 0.022(6) 0.028(5) 0.030(5) 0.001(4) 0.010(4) -0.002(4) 
C12 0.036(7) 0.030(6) 0.031(6) 0.002(5) 0.009(5) -0.001(5) 
C13 0.032(6) 0.018(5) 0.028(5) -0.008(4) -0.005(4) 0.000(4) 
C14 0.032(6) 0.015(5) 0.022(5) -0.014(4) 0.005(4) -0.004(4) 
C15 0.046(7) 0.026(6) 0.027(5) 0.005(5) 0.007(5) -0.004(5) 
C16 0.030(6) 0.017(5) 0.026(5) 0.000(4) 0.000(4) 0.001(4) 
C17 0.027(6) 0.014(5) 0.028(5) -0.005(4) 0.006(4) -0.008(4) 
C21 0.069(9) 0.049(8) 0.041(7) 0.005(6) 0.012(6) -0.030(7) 
C19 0.033(6) 0.038(7) 0.045(6) -0.025(5) 0.006(5) -0.009(5) 
C20 0.038(7) 0.013(6) 0.091(9) -0.011(6) -0.015(7) -0.008(5) 
C18 0.040(7) 0.012(5) 0.024(5) 0.002(4) 0.003(5) -0.002(4) 
C22 0.056(8) 0.028(6) 0.040(6) -0.004(5) 0.003(6) 0.023(6) 
C23 0.032(6) 0.021(6) 0.023(5) 0.013(4) -0.001(4) 0.002(4) 
C24 0.038(7) 0.019(5) 0.036(6) 0.002(4) 0.004(5) 0.004(5) 
P1 0.0258(14) 0.0260(15) 0.0253(13) 0.0001(11) 0.0066(11) -0.0028(12) 
F11 0.073(5) 0.024(3) 0.054(4) 0.007(3) 0.009(4) -0.022(3) 
F12 0.046(4) 0.038(4) 0.035(3) -0.004(3) 0.015(3) -0.008(3) 
F13 0.030(4) 0.040(4) 0.042(4) -0.003(3) 0.006(3) 0.006(3) 
F14 0.028(3) 0.063(5) 0.045(4) 0.011(3) 0.006(3) 0.007(3) 
F15 0.064(5) 0.016(3) 0.048(4) -0.007(3) 0.020(3) -0.009(3) 
F16 0.029(3) 0.061(4) 0.029(3) -0.003(3) 0.005(3) -0.003(3) 
P2 0.0428(19) 0.0299(16) 0.0491(18) -0.0086(14) 0.0187(16) -0.0139(14) 
F21 0.095(6) 0.040(4) 0.067(5) -0.016(4) 0.001(4) -0.004(4) 
F22 0.055(5) 0.082(6) 0.064(5) 0.011(4) 0.018(4) -0.028(4) 
F23A 0.13(2) 0.077(19) 0.077(17) -0.048(13) 0.056(15) -0.047(16) 
F24A 0.024(9) 0.061(13) 0.044(9) 0.002(8) -0.002(7) 0.003(7) 
F25A 0.056(12) 0.063(12) 0.087(14) -0.022(10) 0.049(11) -0.030(9) 
F26A 0.046(11) 0.13(2) 0.049(9) 0.049(13) 0.032(8) 0.040(12) 
F23B 0.060(12) 0.028(9) 0.039(10) -0.022(7) 0.027(8) -0.011(8) 
F24B 0.16(3) 0.030(11) 0.046(11) 0.033(9) 0.035(14) 0.026(13) 
F25B 0.014(8) 0.044(10) 0.071(11) -0.016(8) 0.021(7) -0.018(7) 
F26B 0.052(12) 0.057(13) 0.049(12) -0.016(9) -0.007(9) 0.004(9) 
N3 0.107(10) 0.029(6) 0.050(6) -0.003(5) 0.020(6) 0.003(6) 
C25 0.068(10) 0.052(9) 0.031(6) -0.013(6) 0.009(6) -0.010(7) 
C26 0.086(10) 0.036(7) 0.049(7) 0.005(6) 0.024(7) 0.008(7) 
N4 0.127(12) 0.065(9) 0.058(7) 0.031(7) -0.049(7) -0.045(8) 
C28 0.050(8) 0.049(8) 0.062(8) 0.006(7) 0.003(7) 0.007(7) 
C27 0.067(10) 0.050(9) 0.042(7) -0.008(7) -0.026(7) 0.015(7) 
C29 0.079(12) 0.047(9) 0.123(14) 0.035(9) 0.004(11) -0.010(8) 
C30 0.097(13) 0.048(9) 0.053(8) 0.013(7) 0.005(8) 0.007(8) 
C31 0.075(12) 0.116(15) 0.086(11) 0.057(11) 0.000(10) -0.022(11) 
 
_geom_special_details 
; 
All esds (except the esd in the dihedral angle 
between two l.s. planes) are estimated using the 
full covariance matrix. The cell esds are taken 
into account individually in the estimation of 
esds in distances, angles and torsion angles; 
correlations between esds in cell parameters are 
only used when they are defined by crystal symmetry.  
An approximate (isotropic) treatment of cell esds is 
used for estimating esds involving l.s. planes. 
; 

loop_ 
 _geom_bond_atom_site_label_1 
 _geom_bond_atom_site_label_2 
 _geom_bond_distance 
 _geom_bond_site_symmetry_2 
 _geom_bond_publ_flag 
Pt N2 2.044(7) . ? 
Pt N1 2.066(7) . ? 
Pt S1 2.271(2) . ? 
Pt S2 2.279(2) . ? 
S1 C11 1.818(9) . ? 
S1 C16 1.852(9) . ? 
S2 C13 1.833(9) . ? 
S2 C12 1.839(10) . ? 
S3 C15 1.815(10) . ? 
S3 C14 1.823(9) . ? 
N1 C1 1.342(10) . ? 
N1 C5 1.357(11) . ? 
N2 C10 1.340(10) . ? 
N2 C6 1.349(11) . ? 
C1 C2 1.369(12) . ? 
C1 H1 0.9500 . ? 
C2 C3 1.373(12) . ? 
C2 H2 0.9500 . ? 
C3 C4 1.410(12) . ? 
C3 C17 1.527(12) . ? 
C4 C5 1.376(12) . ? 
C4 H4 0.9500 . ? 
C5 C6 1.468(12) . ? 
C6 C7 1.397(12) . ? 
C7 C8 1.431(11) . ? 
C7 H7 0.9500 . ? 
C8 C9 1.367(12) . ? 
C8 C18 1.519(12) . ? 
C9 C10 1.374(12) . ? 
C9 H9 0.9500 . ? 
C10 H10 0.9500 . ? 
C11 C12 1.497(13) . ? 
C11 H11A 0.9900 . ? 
C11 H11B 0.9900 . ? 
C12 H12A 0.9900 . ? 
C12 H12B 0.9900 . ? 
C13 C14 1.521(12) . ? 
C13 H13A 0.9900 . ? 
C13 H13B 0.9900 . ? 
C14 H14A 0.9900 . ? 
C14 H14B 0.9900 . ? 
C15 C16 1.513(13) . ? 
C15 H15A 0.9900 . ? 
C15 H15B 0.9900 . ? 
C16 H16A 0.9900 . ? 
C16 H16B 0.9900 . ? 
C17 C21 1.511(13) . ? 
C17 C20 1.530(13) . ? 
C17 C19 1.534(12) . ? 
C21 H18A 0.9800 . ? 
C21 H18B 0.9800 . ? 
C21 H18C 0.9800 . ? 
C19 H19A 0.9800 . ? 
C19 H19B 0.9800 . ? 
C19 H19C 0.9800 . ? 
C20 H20A 0.9800 . ? 
C20 H20B 0.9800 . ? 
C20 H20C 0.9800 . ? 
C18 C24 1.515(13) . ? 
C18 C23 1.522(12) . ? 
C18 C22 1.560(13) . ? 
C22 H22A 0.9800 . ? 
C22 H22B 0.9800 . ? 
C22 H22C 0.9800 . ? 
C23 H23A 0.9800 . ? 
C23 H23B 0.9800 . ? 
C23 H23C 0.9800 . ? 
C24 H24A 0.9800 . ? 
C24 H24B 0.9800 . ? 
C24 H24C 0.9800 . ? 
P1 F11 1.590(6) . ? 
P1 F14 1.594(6) . ? 
P1 F16 1.601(6) . ? 
P1 F13 1.602(6) . ? 
P1 F15 1.603(6) . ? 
P1 F12 1.609(6) . ? 
P2 F24B 1.409(16) . ? 
P2 F26B 1.436(17) . ? 
P2 F21 1.544(7) . ? 
P2 F22 1.560(7) . ? 
P2 F23A 1.60(2) . ? 
P2 F23B 1.626(18) . ? 
P2 F25B 1.629(14) . ? 
P2 F25A 1.661(16) . ? 
P2 F24A 1.731(16) . ? 
P2 F26A 1.741(17) . ? 
N3 C25 1.135(14) . ? 
C25 C26 1.503(16) . ? 
C26 H26A 0.9800 . ? 
C26 H26B 0.9800 . ? 
C26 H26C 0.9800 . ? 
N4 C27 1.091(15) . ? 
C28 C27 1.459(17) . ? 
C28 H28A 0.9800 . ? 
C28 H28B 0.9800 . ? 
C28 H28C 0.9800 . ? 
C29 C31 1.353(18) 3_476 ? 
C29 C30 1.380(18) . ? 
C29 H29 0.9500 . ? 
C30 C31 1.433(19) . ? 
C30 H30 0.9500 . ? 
C31 C29 1.353(18) 3_476 ? 
C31 H31 0.9500 . ? 
 
loop_ 
 _geom_angle_atom_site_label_1 
 _geom_angle_atom_site_label_2 
 _geom_angle_atom_site_label_3 
 _geom_angle 
 _geom_angle_site_symmetry_1 
 _geom_angle_site_symmetry_3 
 _geom_angle_publ_flag 
N2 Pt N1 79.2(3) . . ? 
N2 Pt S1 174.7(2) . . ? 
N1 Pt S1 96.4(2) . . ? 
N2 Pt S2 95.5(2) . . ? 
N1 Pt S2 170.8(2) . . ? 
S1 Pt S2 88.43(9) . . ? 
C11 S1 C16 100.1(4) . . ? 
C11 S1 Pt 101.2(3) . . ? 
C16 S1 Pt 109.2(3) . . ? 
C13 S2 C12 102.3(4) . . ? 
C13 S2 Pt 107.1(3) . . ? 
C12 S2 Pt 105.8(3) . . ? 
C15 S3 C14 103.9(5) . . ? 
C1 N1 C5 118.1(7) . . ? 
C1 N1 Pt 127.3(6) . . ? 
C5 N1 Pt 114.6(6) . . ? 
C10 N2 C6 118.4(8) . . ? 
C10 N2 Pt 126.0(6) . . ? 
C6 N2 Pt 115.5(6) . . ? 
N1 C1 C2 121.9(8) . . ? 
N1 C1 H1 119.0 . . ? 
C2 C1 H1 119.0 . . ? 
C1 C2 C3 122.0(8) . . ? 
C1 C2 H2 119.0 . . ? 
C3 C2 H2 119.0 . . ? 
C2 C3 C4 115.7(8) . . ? 
C2 C3 C17 122.3(8) . . ? 
C4 C3 C17 122.0(8) . . ? 
C5 C4 C3 120.5(8) . . ? 
C5 C4 H4 119.8 . . ? 
C3 C4 H4 119.8 . . ? 
N1 C5 C4 121.7(8) . . ? 
N1 C5 C6 115.1(8) . . ? 
C4 C5 C6 123.0(8) . . ? 
N2 C6 C7 121.0(8) . . ? 
N2 C6 C5 115.2(8) . . ? 
C7 C6 C5 123.8(8) . . ? 
C6 C7 C8 120.5(8) . . ? 
C6 C7 H7 119.8 . . ? 
C8 C7 H7 119.8 . . ? 
C9 C8 C7 115.6(8) . . ? 
C9 C8 C18 122.5(8) . . ? 
C7 C8 C18 121.8(8) . . ? 
C8 C9 C10 121.5(9) . . ? 
C8 C9 H9 119.3 . . ? 
C10 C9 H9 119.3 . . ? 
N2 C10 C9 123.0(9) . . ? 
N2 C10 H10 118.5 . . ? 
C9 C10 H10 118.5 . . ? 
C12 C11 S1 113.1(7) . . ? 
C12 C11 H11A 109.0 . . ? 
S1 C11 H11A 109.0 . . ? 
C12 C11 H11B 109.0 . . ? 
S1 C11 H11B 109.0 . . ? 
H11A C11 H11B 107.8 . . ? 
C11 C12 S2 111.2(7) . . ? 
C11 C12 H12A 109.4 . . ? 
S2 C12 H12A 109.4 . . ? 
C11 C12 H12B 109.4 . . ? 
S2 C12 H12B 109.4 . . ? 
H12A C12 H12B 108.0 . . ? 
C14 C13 S2 117.9(6) . . ? 
C14 C13 H13A 107.8 . . ? 
S2 C13 H13A 107.8 . . ? 
C14 C13 H13B 107.8 . . ? 
S2 C13 H13B 107.8 . . ? 
H13A C13 H13B 107.2 . . ? 
C13 C14 S3 114.6(6) . . ? 
C13 C14 H14A 108.6 . . ? 
S3 C14 H14A 108.6 . . ? 
C13 C14 H14B 108.6 . . ? 
S3 C14 H14B 108.6 . . ? 
H14A C14 H14B 107.6 . . ? 
C16 C15 S3 116.9(7) . . ? 
C16 C15 H15A 108.1 . . ? 
S3 C15 H15A 108.1 . . ? 
C16 C15 H15B 108.1 . . ? 
S3 C15 H15B 108.1 . . ? 
H15A C15 H15B 107.3 . . ? 
C15 C16 S1 115.8(7) . . ? 
C15 C16 H16A 108.3 . . ? 
S1 C16 H16A 108.3 . . ? 
C15 C16 H16B 108.3 . . ? 
S1 C16 H16B 108.3 . . ? 
H16A C16 H16B 107.4 . . ? 
C21 C17 C3 107.7(8) . . ? 
C21 C17 C20 108.6(9) . . ? 
C3 C17 C20 112.4(7) . . ? 
C21 C17 C19 110.6(9) . . ? 
C3 C17 C19 109.0(8) . . ? 
C20 C17 C19 108.5(8) . . ? 
C17 C21 H18A 109.5 . . ? 
C17 C21 H18B 109.5 . . ? 
H18A C21 H18B 109.5 . . ? 
C17 C21 H18C 109.5 . . ? 
H18A C21 H18C 109.5 . . ? 
H18B C21 H18C 109.5 . . ? 
C17 C19 H19A 109.5 . . ? 
C17 C19 H19B 109.5 . . ? 
H19A C19 H19B 109.5 . . ? 
C17 C19 H19C 109.5 . . ? 
H19A C19 H19C 109.5 . . ? 
H19B C19 H19C 109.5 . . ? 
C17 C20 H20A 109.5 . . ? 
C17 C20 H20B 109.5 . . ? 
H20A C20 H20B 109.5 . . ? 
C17 C20 H20C 109.5 . . ? 
H20A C20 H20C 109.5 . . ? 
H20B C20 H20C 109.5 . . ? 
C24 C18 C8 114.0(8) . . ? 
C24 C18 C23 108.1(8) . . ? 
C8 C18 C23 107.8(8) . . ? 
C24 C18 C22 108.3(9) . . ? 
C8 C18 C22 109.2(7) . . ? 
C23 C18 C22 109.5(8) . . ? 
C18 C22 H22A 109.5 . . ? 
C18 C22 H22B 109.5 . . ? 
H22A C22 H22B 109.5 . . ? 
C18 C22 H22C 109.5 . . ? 
H22A C22 H22C 109.5 . . ? 
H22B C22 H22C 109.5 . . ? 
C18 C23 H23A 109.5 . . ? 
C18 C23 H23B 109.5 . . ? 
H23A C23 H23B 109.5 . . ? 
C18 C23 H23C 109.5 . . ? 
H23A C23 H23C 109.5 . . ? 
H23B C23 H23C 109.5 . . ? 
C18 C24 H24A 109.5 . . ? 
C18 C24 H24B 109.5 . . ? 
H24A C24 H24B 109.5 . . ? 
C18 C24 H24C 109.5 . . ? 
H24A C24 H24C 109.5 . . ? 
H24B C24 H24C 109.5 . . ? 
F11 P1 F14 90.2(4) . . ? 
F11 P1 F16 90.8(3) . . ? 
F14 P1 F16 90.1(3) . . ? 
F11 P1 F13 90.3(4) . . ? 
F14 P1 F13 179.2(4) . . ? 
F16 P1 F13 89.3(3) . . ? 
F11 P1 F15 179.6(4) . . ? 
F14 P1 F15 90.0(3) . . ? 
F16 P1 F15 89.5(3) . . ? 
F13 P1 F15 89.4(3) . . ? 
F11 P1 F12 90.3(3) . . ? 
F14 P1 F12 89.9(3) . . ? 
F16 P1 F12 178.9(4) . . ? 
F13 P1 F12 90.7(3) . . ? 
F15 P1 F12 89.4(3) . . ? 
F24B P2 F26B 145.7(12) . . ? 
F24B P2 F21 97.9(9) . . ? 
F26B P2 F21 100.1(8) . . ? 
F24B P2 F22 105.4(11) . . ? 
F26B P2 F22 102.6(8) . . ? 
F21 P2 F22 92.7(4) . . ? 
F21 P2 F23A 161.3(10) . . ? 
F22 P2 F23A 91.2(9) . . ? 
F24B P2 F23B 71.8(10) . . ? 
F26B P2 F23B 92.7(9) . . ? 
F21 P2 F23B 167.1(7) . . ? 
F22 P2 F23B 82.9(8) . . ? 
F24B P2 F25B 58.8(11) . . ? 
F26B P2 F25B 90.9(10) . . ? 
F21 P2 F25B 93.8(6) . . ? 
F22 P2 F25B 163.7(7) . . ? 
F23B P2 F25B 87.5(9) . . ? 
F21 P2 F25A 82.2(6) . . ? 
F22 P2 F25A 160.8(8) . . ? 
F23A P2 F25A 88.2(11) . . ? 
F21 P2 F24A 81.7(7) . . ? 
F22 P2 F24A 80.6(7) . . ? 
F23A P2 F24A 117.0(11) . . ? 
F25A P2 F24A 116.6(9) . . ? 
F21 P2 F26A 81.9(8) . . ? 
F22 P2 F26A 79.3(6) . . ? 
F23A P2 F26A 80.9(11) . . ? 
F25A P2 F26A 81.7(9) . . ? 
F24A P2 F26A 153.3(9) . . ? 
N3 C25 C26 179.0(14) . . ? 
C25 C26 H26A 109.5 . . ? 
C25 C26 H26B 109.5 . . ? 
H26A C26 H26B 109.5 . . ? 
C25 C26 H26C 109.5 . . ? 
H26A C26 H26C 109.5 . . ? 
H26B C26 H26C 109.5 . . ? 
C27 C28 H28A 109.5 . . ? 
C27 C28 H28B 109.5 . . ? 
H28A C28 H28B 109.5 . . ? 
C27 C28 H28C 109.5 . . ? 
H28A C28 H28C 109.5 . . ? 
H28B C28 H28C 109.5 . . ? 
N4 C27 C28 166.0(18) . . ? 
C31 C29 C30 122.0(15) 3_476 . ? 
C31 C29 H29 119.0 3_476 . ? 
C30 C29 H29 119.0 . . ? 
C29 C30 C31 121.3(13) . . ? 
C29 C30 H30 119.3 . . ? 
C31 C30 H30 119.3 . . ? 
C29 C31 C30 116.5(14) 3_476 . ? 
C29 C31 H31 121.8 3_476 . ? 
C30 C31 H31 121.8 . . ? 
 
 
_diffrn_measured_fraction_theta_max    0.994 
_diffrn_reflns_theta_full              28.30 
_diffrn_measured_fraction_theta_full   0.994 
_refine_diff_density_max    1.847 
_refine_diff_density_min   -2.424 
_refine_diff_density_rms    0.251 


# eof data_6 ================================================ 
